# Supplementary material for: Black Grouse Hissing Calls Show Geographic Variability across the Distribution Area
Source: MDPI journal article supplement (doi:10.3390/ani13111844), 2023-06-01
Supplement: s1 [file s1]

| Country        | ID | High<br>Freq<br>(Hz) | Agg<br>Entropy<br>(bits) | Delta<br>Time (s) | Dur 50%<br>(s) | Freq<br>25% (Hz) | Freq 5%<br>(Hz) | Freq<br>95% (Hz) | Min<br>Entropy<br>(bits) | Time<br>25% Rel, | Time 5%<br>Rel, | Time 95%<br>(s) | Time<br>95% Rel, |
|----------------|----|----------------------|--------------------------|-------------------|----------------|------------------|-----------------|------------------|--------------------------|------------------|-----------------|-----------------|------------------|
| Czech Republic | 1  | 1664,2               | 2,338                    | 0,7312            | 0,2560         | 1031,25          | 843,75          | 1312,50          | 1,332                    | 0,1103           | 0,0809          | 60,6773         | 0,7941           |
| Czech Republic | 1  | 1751,8               | 2,380                    | 0,8578            | 0,2293         | 1125,00          | 750,00          | 1312,50          | 1,420                    | 0,1437           | 0,0750          | 62,6133         | 0,7375           |
| Czech Republic | 1  | 1751,8               | 2,596                    | 0,8156            | 0,2133         | 1031,25          | 562,50          | 1312,50          | 1,468                    | 0,1974           | 0,0987          | 64,2080         | 0,7829           |
| Czech Republic | 1  | 1839,4               | 2,932                    | 0,8999            | 0,3840         | 1031,25          | 750,00          | 1500,00          | 1,632                    | 0,2798           | 0,1012          | 78,5493         | 0,9107           |
| Czech Republic | 1  | 1751,8               | 2,122                    | 0,7734            | 0,2667         | 1125,00          | 1031,25         | 1312,50          | 1,333                    | 0,1389           | 0,0625          | 80,8213         | 0,7778           |
| Czech Republic | 1  | 1751,8               | 2,147                    | 0,7734            | 0,3573         | 1125,00          | 1031,25         | 1312,50          | 1,295                    | 0,1389           | 0,0903          | 84,6453         | 0,8333           |
| Czech Republic | 2  | 1927,0               | 3,165                    | 0,8737            | 0,4800         | 1125,00          | 562,50          | 1593,75          | 1,127                    | 0,1288           | 0,0675          | 10,7947         | 0,9080           |
| Czech Republic | 2  | 2014,6               | 2,727                    | 1,2759            | 0,2880         | 1312,50          | 1031,25         | 1593,75          | 1,326                    | 0,4874           | 0,0756          | 44,5867         | 0,8403           |
| Czech Republic | 2  | 2189,8               | 3,112                    | 1,1650            | 0,3413         | 1218,75          | 656,25          | 1593,75          | 1,565                    | 0,4516           | 0,1198          | 53,1733         | 0,8986           |
| Czech Republic | 2  | 2102,2               | 3,497                    | 1,0402            | 0,3253         | 1218,75          | 562,50          | 1687,50          | 1,532                    | 0,5000           | 0,1289          | 60,2987         | 0,9124           |
| Czech Republic | 2  | 2102,2               | 2,348                    | 1,1095            | 0,1707         | 1312,50          | 1031,25         | 1500,00          | 1,317                    | 0,5652           | 0,1836          | 72,1600         | 0,8599           |
| Czech Republic | 2  | 2014,6               | 2,765                    | 1,1095            | 0,2400         | 1312,50          | 656,25          | 1500,00          | 1,283                    | 0,4686           | 0,1014          | 80,4640         | 0,8502           |
| Czech Republic | 2  | 2014,6               | 2,859                    | 0,9847            | 0,1653         | 1312,50          | 656,25          | 1500,00          | 1,435                    | 0,5792           | 0,1257          | 108,8853        | 0,8634           |
| Czech Republic | 3  | 2108,5               | 2,315                    | 1,1691            | 0,1973         | 1312,50          | 1125,00         | 1593,75          | 1,290                    | 0,4954           | 0,1789          | 11,0880         | 0,8257           |
| Czech Republic | 3  | 2170,5               | 3,066                    | 1,4556            | 0,2347         | 1312,50          | 1031,25         | 1875,00          | 1,399                    | 0,5441           | 0,1324          | 20,8213         | 0,8235           |
| Czech Republic | 3  | 2294,6               | 3,313                    | 1,0659            | 0,3680         | 1312,50          | 1125,00         | 2062,50          | 1,390                    | 0,3939           | 0,0707          | 24,5813         | 0,8889           |
| Czech Republic | 3  | 2294,6               | 2,676                    | 0,9399            | 0,3467         | 1218,75          | 1125,00         | 1781,25          | 1,354                    | 0,0914           | 0,0629          | 27,5733         | 0,8514           |
| Czech Republic | 3  | 2108,5               | 2,978                    | 0,9399            | 0,2293         | 1312,50          | 750,00          | 1593,75          | 1,410                    | 0,5600           | 0,1143          | 52,2027         | 0,9429           |
| Czech Republic | 4  | 2506,5               | 2,524                    | 1,1268            | 0,0960         | 1406,25          | 1312,50         | 1781,25          | 1,392                    | 0,6019           | 0,0995          | 5,9467          | 0,7725           |
| Czech Republic | 4  | 2381,2               | 2,456                    | 1,0321            | 0,0800         | 1218,75          | 843,75          | 1500,00          | 0,758                    | 0,1347           | 0,0725          | 14,3307         | 0,7150           |
| Czech Republic | 4  | 2255,9               | 2,762                    | 1,0426            | 0,5440         | 1312,50          | 1125,00         | 1593,75          | 1,252                    | 0,1598           | 0,0722          | 20,8267         | 0,8454           |
| Czech Republic | 4  | 2443,9               | 3,152                    | 1,1058            | 0,6293         | 1312,50          | 1125,00         | 1875,00          | 1,338                    | 0,1019           | 0,0631          | 28,9653         | 0,8786           |
| Czech Republic | 4  | 2631,9               | 2,728                    | 1,0742            | 0,5600         | 1312,50          | 1125,00         | 1687,50          | 1,264                    | 0,1150           | 0,0800          | 47,7547         | 0,8200           |
| Czech Republic | 4  | 2318,5               | 2,755                    | 0,9267            | 0,2507         | 1312,50          | 1125,00         | 1593,75          | 1,288                    | 0,4855           | 0,1040          | 75,8507         | 0,8497           |
| Czech Republic | 4  | 2193,2               | 2,651                    | 0,9899            | 0,7733         | 1406,25          | 1218,75         | 1781,25          | 1,383                    | 0,0595           | 0,0432          | 80,0907         | 0,9514           |
| Czech Republic | 4  | 2318,5               | 2,557                    | 1,2216            | 0,2933         | 1406,25          | 1218,75         | 1687,50          | 1,307                    | 0,4693           | 0,0614          | 159,1680        | 0,8289           |
| Czech Republic | 4  | 2255,9               | 2,492                    | 1,2006            | 0,6240         | 1312,50          | 1218,75         | 1593,75          | 1,298                    | 0,1027           | 0,0759          | 169,7067        | 0,7277           |
| Czech Republic | 4  | 2506,5               | 2,704                    | 1,1268            | 0,5813         | 1406,25          | 1218,75         | 1687,50          | 1,415                    | 0,1190           | 0,0714          | 171,0987        | 0,7571           |

|                |   |        |       |        |        |         |         |         |       |        |        |          |        |
|----------------|---|--------|-------|--------|--------|---------|---------|---------|-------|--------|--------|----------|--------|
| Czech Republic | 4 | 2005,2 | 2,665 | 0,9794 | 0,5973 | 1312,50 | 1125,00 | 1593,75 | 1,251 | 0,1484 | 0,0604 | 191,7173 | 0,8681 |
| Czech Republic | 4 | 2193,2 | 2,782 | 1,0847 | 0,6400 | 1406,25 | 1218,75 | 1781,25 | 1,492 | 0,1330 | 0,0739 | 223,4933 | 0,7931 |
| Czech Republic | 4 | 2381,2 | 2,654 | 0,8952 | 0,5707 | 1312,50 | 1125,00 | 1593,75 | 1,452 | 0,1377 | 0,0659 | 259,5840 | 0,8802 |
| Czech Republic | 5 | 2711,5 | 3,892 | 0,9388 | 0,5653 | 1312,50 | 843,75  | 2062,50 | 1,609 | 0,1257 | 0,0743 | 16,6453  | 0,8229 |
| Czech Republic | 5 | 2596,2 | 3,523 | 1,0078 | 0,6027 | 1312,50 | 1125,00 | 1968,75 | 1,608 | 0,1064 | 0,0798 | 58,2080  | 0,8404 |
| Czech Republic | 5 | 2365,4 | 3,001 | 1,0492 | 0,5760 | 1406,25 | 1218,75 | 1875,00 | 1,415 | 0,1333 | 0,0564 | 123,0187 | 0,8256 |
| Czech Republic | 5 | 2365,4 | 2,978 | 0,8283 | 0,5653 | 1312,50 | 1218,75 | 1781,25 | 1,435 | 0,0779 | 0,0584 | 133,3707 | 0,9091 |
| Czech Republic | 5 | 2365,4 | 3,150 | 1,0492 | 0,6027 | 1312,50 | 1125,00 | 1875,00 | 1,361 | 0,1480 | 0,0714 | 148,2080 | 0,8520 |
| Czech Republic | 5 | 2538,5 | 3,013 | 0,9250 | 0,5547 | 1312,50 | 1125,00 | 1781,25 | 1,619 | 0,0988 | 0,0756 | 154,7787 | 0,8372 |
| Czech Republic | 5 | 2711,5 | 3,386 | 1,2563 | 0,4320 | 1593,75 | 1125,00 | 2062,50 | 1,333 | 0,4231 | 0,0641 | 164,0373 | 0,8974 |
| Czech Republic | 5 | 2480,8 | 3,474 | 0,8698 | 0,4800 | 1406,25 | 937,50  | 1968,75 | 1,738 | 0,1358 | 0,0864 | 199,1520 | 0,8642 |
| Czech Republic | 5 | 2538,5 | 3,277 | 1,0492 | 0,6133 | 1500,00 | 937,50  | 1968,75 | 1,205 | 0,1020 | 0,0765 | 201,3440 | 0,8316 |
| Czech Republic | 5 | 2423,1 | 2,431 | 1,1321 | 0,2080 | 1312,50 | 1218,75 | 1593,75 | 1,322 | 0,5403 | 0,0900 | 208,2400 | 0,8152 |
| Czech Republic | 5 | 2423,1 | 3,074 | 1,0078 | 0,2400 | 1312,50 | 1218,75 | 1875,00 | 1,353 | 0,5053 | 0,0638 | 220,8587 | 0,8830 |
| Czech Republic | 5 | 2596,2 | 3,461 | 1,0078 | 0,5813 | 1500,00 | 1218,75 | 2062,50 | 1,046 | 0,0904 | 0,0638 | 228,1600 | 0,8085 |
| Czech Republic | 6 | 2713,0 | 2,715 | 1,3315 | 0,2027 | 1500,00 | 1406,25 | 1875,00 | 1,398 | 0,5743 | 0,0964 | 28,0213  | 0,8233 |
| Czech Republic | 6 | 2504,3 | 3,070 | 1,2427 | 0,6987 | 1406,25 | 1312,50 | 1875,00 | 1,288 | 0,0948 | 0,0647 | 33,1147  | 0,7974 |
| Czech Republic | 6 | 2991,3 | 3,297 | 1,0398 | 0,6560 | 1312,50 | 1218,75 | 1875,00 | 1,599 | 0,1082 | 0,0722 | 40,4533  | 0,8402 |
| Czech Republic | 6 | 2643,5 | 2,954 | 1,1920 | 0,5440 | 1500,00 | 1312,50 | 1875,00 | 0,769 | 0,1126 | 0,0901 | 46,7253  | 0,7387 |
| Czech Republic | 6 | 2504,3 | 3,236 | 1,0779 | 0,5600 | 1406,25 | 1218,75 | 1968,75 | 0,811 | 0,1040 | 0,0644 | 50,9227  | 0,7673 |
| Czech Republic | 6 | 2504,3 | 3,260 | 1,0652 | 0,6133 | 1406,25 | 1218,75 | 1968,75 | 1,706 | 0,1106 | 0,0704 | 57,4027  | 0,7688 |
| Czech Republic | 6 | 2713,0 | 3,227 | 0,8876 | 0,4853 | 1312,50 | 1218,75 | 1875,00 | 1,719 | 0,1091 | 0,0788 | 78,9440  | 0,8242 |
| Czech Republic | 6 | 2573,9 | 3,246 | 1,0271 | 0,6027 | 1312,50 | 843,75  | 1781,25 | 0,949 | 0,1094 | 0,0729 | 114,7787 | 0,8958 |
| Czech Republic | 6 | 2504,3 | 2,822 | 0,9003 | 0,4853 | 1406,25 | 1312,50 | 1781,25 | 1,478 | 0,0958 | 0,0599 | 154,8960 | 0,7305 |
| Czech Republic | 6 | 2365,2 | 2,877 | 0,9637 | 0,5280 | 1312,50 | 1218,75 | 1687,50 | 1,272 | 0,0950 | 0,0670 | 163,0187 | 0,8212 |
| Czech Republic | 6 | 2504,3 | 2,616 | 1,1413 | 0,1707 | 1406,25 | 1218,75 | 1687,50 | 1,280 | 0,4789 | 0,1221 | 171,7547 | 0,7465 |
| Czech Republic | 6 | 2643,5 | 3,097 | 0,9003 | 0,5813 | 1500,00 | 1312,50 | 1968,75 | 1,408 | 0,0833 | 0,0595 | 178,1120 | 0,8393 |
| Czech Republic | 6 | 2156,5 | 3,065 | 1,2934 | 0,7573 | 1218,75 | 1125,00 | 1781,25 | 1,235 | 0,0992 | 0,0620 | 249,9040 | 0,8017 |
| Czech Republic | 6 | 2504,3 | 3,166 | 1,3315 | 0,2880 | 1406,25 | 1218,75 | 1875,00 | 1,449 | 0,4355 | 0,0645 | 286,8267 | 0,7863 |
| Czech Republic | 6 | 2504,3 | 3,190 | 1,2427 | 0,6773 | 1406,25 | 1125,00 | 1875,00 | 1,211 | 0,0948 | 0,0647 | 291,5147 | 0,8190 |
| Czech Republic | 6 | 2434,8 | 3,386 | 1,1286 | 0,6133 | 1218,75 | 1125,00 | 1875,00 | 1,346 | 0,1381 | 0,0857 | 293,4293 | 0,8333 |

|                |    |        |       |        |        |         |         |         |       |        |        |          |        |
|----------------|----|--------|-------|--------|--------|---------|---------|---------|-------|--------|--------|----------|--------|
| Czech Republic | 6  | 2643,5 | 3,245 | 1,1159 | 0,6720 | 1500,00 | 1312,50 | 1968,75 | 1,513 | 0,1106 | 0,0817 | 295,8347 | 0,8173 |
| Czech Republic | 6  | 2226,1 | 2,876 | 1,2807 | 0,3467 | 1312,50 | 1125,00 | 1687,50 | 1,460 | 0,4500 | 0,0625 | 310,8053 | 0,8083 |
| Czech Republic | 7  | 2497,1 | 2,816 | 0,9071 | 0,5333 | 1406,25 | 1218,75 | 1781,25 | 1,481 | 0,1479 | 0,0888 | 28,7307  | 0,8994 |
| Czech Republic | 7  | 2427,7 | 2,467 | 0,9761 | 0,5440 | 1406,25 | 1312,50 | 1781,25 | 1,334 | 0,1374 | 0,0934 | 42,3467  | 0,8626 |
| Czech Republic | 7  | 2566,5 | 2,539 | 0,8774 | 0,4587 | 1406,25 | 1218,75 | 1687,50 | 1,333 | 0,1350 | 0,0859 | 59,0400  | 0,8896 |
| Czech Republic | 7  | 2289,0 | 2,952 | 1,0707 | 0,5813 | 1406,25 | 1218,75 | 1875,00 | 1,074 | 0,1500 | 0,0850 | 80,7627  | 0,8550 |
| Czech Republic | 7  | 2427,7 | 2,711 | 1,0855 | 0,6027 | 1406,25 | 1312,50 | 1781,25 | 1,363 | 0,2020 | 0,0887 | 92,1973  | 0,8867 |
| Czech Republic | 7  | 2497,1 | 2,790 | 1,0409 | 0,4427 | 1406,25 | 1312,50 | 1781,25 | 1,372 | 0,2769 | 0,0872 | 153,4347 | 0,8769 |
| Czech Republic | 7  | 2635,8 | 2,910 | 1,0707 | 0,4160 | 1406,25 | 1312,50 | 1875,00 | 1,258 | 0,3400 | 0,1000 | 180,0693 | 0,8550 |
| Czech Republic | 7  | 2358,4 | 2,915 | 1,0707 | 0,6027 | 1406,25 | 1312,50 | 1875,00 | 1,315 | 0,1307 | 0,0905 | 222,6880 | 0,8894 |
| Czech Republic | 7  | 2427,7 | 2,675 | 0,8922 | 0,4107 | 1406,25 | 1312,50 | 1781,25 | 1,286 | 0,1084 | 0,0723 | 240,7467 | 0,8253 |
| Czech Republic | 7  | 2289,0 | 2,598 | 0,8922 | 0,4640 | 1406,25 | 1312,50 | 1687,50 | 1,358 | 0,1687 | 0,1205 | 261,6213 | 0,8675 |
| Czech Republic | 7  | 2289,0 | 2,775 | 0,9814 | 0,4960 | 1406,25 | 1218,75 | 1875,00 | 1,330 | 0,1858 | 0,0656 | 318,3147 | 0,8852 |
| Czech Republic | 8  | 2176,2 | 2,808 | 0,9837 | 0,4800 | 1406,25 | 1218,75 | 1781,25 | 1,377 | 0,1803 | 0,0656 | 11,6587  | 0,8525 |
| Czech Republic | 8  | 2362,7 | 3,078 | 1,0274 | 0,2773 | 1406,25 | 1218,75 | 2156,25 | 1,354 | 0,4375 | 0,0990 | 47,8347  | 0,8125 |
| Czech Republic | 8  | 2176,2 | 2,375 | 0,8526 | 0,5173 | 1406,25 | 1218,75 | 1687,50 | 1,427 | 0,1132 | 0,0629 | 63,6587  | 0,8302 |
| Czech Republic | 8  | 2176,2 | 2,805 | 0,7870 | 0,4427 | 1406,25 | 1218,75 | 1781,25 | 1,460 | 0,0952 | 0,0476 | 92,0907  | 0,8095 |
| Czech Republic | 8  | 2627,7 | 2,860 | 0,9093 | 0,4213 | 1406,25 | 1218,75 | 1968,75 | 1,324 | 0,0888 | 0,0592 | 13,9413  | 0,7456 |
| Czech Republic | 8  | 2189,8 | 2,262 | 0,7558 | 0,4213 | 1406,25 | 1312,50 | 1687,50 | 1,437 | 0,0786 | 0,0500 | 19,7653  | 0,8000 |
| Czech Republic | 8  | 2189,8 | 2,535 | 0,9329 | 0,1600 | 1406,25 | 1218,75 | 1687,50 | 1,391 | 0,5172 | 0,0805 | 44,9013  | 0,7931 |
| Czech Republic | 8  | 2102,2 | 2,971 | 0,8384 | 0,4587 | 1406,25 | 1218,75 | 1781,25 | 1,636 | 0,0892 | 0,0573 | 144,3787 | 0,8280 |
| Czech Republic | 9  | 2277,4 | 2,604 | 0,7088 | 0,1813 | 1500,00 | 1218,75 | 1687,50 | 1,406 | 0,4697 | 0,0909 | 34,4427  | 0,8258 |
| Czech Republic | 9  | 2540,1 | 2,647 | 0,8544 | 0,2773 | 1406,25 | 1312,50 | 2250,00 | 1,366 | 0,3019 | 0,0818 | 38,7787  | 0,7610 |
| Czech Republic | 9  | 2102,2 | 2,608 | 0,8861 | 0,5493 | 1500,00 | 1218,75 | 1687,50 | 1,281 | 0,1758 | 0,0727 | 65,1947  | 0,8667 |
| Czech Republic | 9  | 2802,9 | 2,318 | 0,8987 | 0,4587 | 1406,25 | 1312,50 | 1687,50 | 1,291 | 0,1557 | 0,0719 | 77,5467  | 0,8084 |
| Czech Republic | 9  | 2452,6 | 2,591 | 1,0374 | 0,5120 | 1312,50 | 1218,75 | 1593,75 | 1,289 | 0,1140 | 0,0570 | 15,5787  | 0,7824 |
| Czech Republic | 9  | 2627,7 | 2,942 | 1,0522 | 0,4160 | 1406,25 | 1312,50 | 1875,00 | 1,245 | 0,2194 | 0,0867 | 39,6000  | 0,8316 |
| Czech Republic | 9  | 2540,1 | 2,522 | 1,0522 | 0,2027 | 1500,00 | 1312,50 | 1781,25 | 1,263 | 0,5408 | 0,1122 | 90,8587  | 0,8673 |
| Czech Republic | 10 | 2365,0 | 3,237 | 0,8594 | 0,1973 | 1593,75 | 1218,75 | 2062,50 | 1,458 | 0,6625 | 0,1000 | 8,6720   | 0,9563 |
| Czech Republic | 10 | 2627,7 | 3,056 | 0,8254 | 0,3787 | 1406,25 | 1218,75 | 1968,75 | 1,353 | 0,1429 | 0,0714 | 12,2400  | 0,7532 |
| Czech Republic | 10 | 2715,3 | 3,553 | 0,8368 | 0,3573 | 1500,00 | 1218,75 | 2156,25 | 1,263 | 0,3910 | 0,0641 | 113,0240 | 0,9295 |

|                |    |        |       |        |        |         |         |         |       |        |        |          |        |
|----------------|----|--------|-------|--------|--------|---------|---------|---------|-------|--------|--------|----------|--------|
| Czech Republic | 10 | 2540,1 | 3,158 | 0,7802 | 0,4587 | 1406,25 | 1218,75 | 1968,75 | 1,310 | 0,1379 | 0,1034 | 201,6373 | 0,8207 |
| Czech Republic | 10 | 2627,7 | 2,855 | 0,7865 | 0,3680 | 1312,50 | 1218,75 | 1781,25 | 1,332 | 0,1088 | 0,0748 | 105,4613 | 0,7211 |
| Czech Republic | 10 | 2365,0 | 2,766 | 0,7770 | 0,3680 | 1406,25 | 1218,75 | 1781,25 | 1,343 | 0,0966 | 0,0690 | 116,6933 | 0,6621 |
| Czech Republic | 10 | 2540,1 | 3,217 | 0,9965 | 0,5387 | 1500,00 | 1312,50 | 2062,50 | 1,413 | 0,1129 | 0,0860 | 23,0827  | 0,7957 |
| Czech Republic | 10 | 2452,6 | 2,930 | 0,8521 | 0,4267 | 1406,25 | 1218,75 | 1968,75 | 1,292 | 0,0881 | 0,0629 | 81,2053  | 0,8176 |
| Czech Republic | 11 | 2102,2 | 2,482 | 1,0170 | 0,6027 | 1500,00 | 1312,50 | 1781,25 | 1,343 | 0,0847 | 0,0582 | 33,4240  | 0,8042 |
| Czech Republic | 11 | 2452,6 | 2,962 | 0,9055 | 0,4747 | 1500,00 | 1406,25 | 1968,75 | 1,323 | 0,1420 | 0,0710 | 65,1147  | 0,8047 |
| Czech Republic | 11 | 2540,1 | 3,809 | 1,0309 | 0,2880 | 1312,50 | 1031,25 | 2437,50 | 1,950 | 0,4508 | 0,0622 | 73,8667  | 0,8705 |
| Czech Republic | 11 | 2452,6 | 3,122 | 0,9752 | 0,4907 | 1500,00 | 1312,50 | 2250,00 | 1,520 | 0,1593 | 0,0714 | 76,9067  | 0,8242 |
| Czech Republic | 11 | 2452,6 | 3,322 | 0,9334 | 0,5387 | 1406,25 | 1218,75 | 1968,75 | 1,721 | 0,1149 | 0,0747 | 80,1653  | 0,8621 |
| Czech Republic | 11 | 2715,3 | 3,128 | 1,1284 | 0,4213 | 1406,25 | 1125,00 | 1875,00 | 1,325 | 0,3839 | 0,0948 | 91,4560  | 0,8863 |
| Czech Republic | 11 | 3115,4 | 3,654 | 1,1220 | 0,2453 | 1406,25 | 1312,50 | 2250,00 | 1,645 | 0,5048 | 0,0952 | 27,2213  | 0,8857 |
| Czech Republic | 11 | 2192,3 | 3,112 | 0,8144 | 0,3627 | 1312,50 | 1218,75 | 1781,25 | 1,668 | 0,2039 | 0,1579 | 28,5760  | 0,7500 |
| Czech Republic | 11 | 2538,5 | 3,456 | 0,8325 | 0,4160 | 1406,25 | 1218,75 | 2250,00 | 1,775 | 0,1806 | 0,1161 | 30,7413  | 0,8581 |
| Czech Republic | 11 | 2653,8 | 3,582 | 1,0677 | 0,5173 | 1218,75 | 937,50  | 1968,75 | 1,015 | 0,1910 | 0,1005 | 62,9867  | 0,8593 |
| Czech Republic | 11 | 2538,5 | 3,359 | 1,0677 | 0,2613 | 1406,25 | 1218,75 | 1968,75 | 1,723 | 0,4673 | 0,0603 | 81,5200  | 0,8543 |
| Czech Republic | 12 | 2537,9 | 2,448 | 1,1033 | 0,3653 | 1125,00 | 562,50  | 1687,50 | 0,414 | 0,2906 | 0,0678 | 20,6000  | 0,8111 |
| Czech Republic | 12 | 2427,6 | 2,365 | 0,8874 | 0,2987 | 1125,00 | 750,00  | 1687,50 | 1,042 | 0,2054 | 0,0876 | 97,8293  | 0,7825 |
| Czech Republic | 12 | 2537,9 | 2,518 | 0,9713 | 0,2560 | 1125,00 | 937,50  | 1687,50 | 1,400 | 0,2912 | 0,0989 | 101,3653 | 0,7363 |
| Czech Republic | 12 | 2758,6 | 2,465 | 1,0793 | 0,4480 | 1312,50 | 937,50  | 1875,00 | 1,391 | 0,2252 | 0,1015 | 106,2453 | 0,7847 |
| Czech Republic | 12 | 2758,6 | 2,290 | 1,2232 | 0,5920 | 1125,00 | 937,50  | 1687,50 | 1,396 | 0,1138 | 0,0613 | 111,6720 | 0,8118 |
| Czech Republic | 12 | 2427,6 | 2,184 | 1,2112 | 0,2240 | 1125,00 | 937,50  | 1687,50 | 1,260 | 0,2936 | 0,0883 | 143,6587 | 0,7417 |
| Czech Republic | 12 | 2096,6 | 2,479 | 1,2112 | 0,3840 | 1125,00 | 937,50  | 1687,50 | 1,286 | 0,2826 | 0,0773 | 170,5973 | 0,7638 |
| Czech Republic | 12 | 2447,6 | 2,103 | 1,1022 | 0,1440 | 1125,00 | 937,50  | 1687,50 | 1,332 | 0,4587 | 0,1117 | 36,4400  | 0,7937 |
| Czech Republic | 12 | 2447,6 | 2,257 | 1,0555 | 0,2347 | 1125,00 | 937,50  | 1687,50 | 1,253 | 0,2937 | 0,1114 | 40,8027  | 0,7924 |
| Czech Republic | 12 | 2583,6 | 2,036 | 1,1022 | 0,3333 | 1125,00 | 937,50  | 1500,00 | 0,997 | 0,1262 | 0,0728 | 105,1120 | 0,6772 |
| Czech Republic | 12 | 2583,6 | 2,394 | 1,1769 | 0,4480 | 1125,00 | 187,50  | 1500,00 | 0,217 | 0,2114 | 0,0932 | 127,9333 | 0,7864 |
| Czech Republic | 12 | 2063,0 | 2,256 | 1,0149 | 0,3813 | 1125,00 | 937,50  | 1687,50 | 1,228 | 0,2190 | 0,0765 | 44,3333  | 0,7335 |
| Czech Republic | 12 | 2200,6 | 2,576 | 1,1455 | 0,3680 | 1125,00 | 187,50  | 1687,50 | 0,183 | 0,2313 | 0,0935 | 49,0933  | 0,8224 |
| Czech Republic | 12 | 2750,7 | 2,665 | 1,2460 | 0,3253 | 187,50  | 0,00    | 1500,00 | 0,723 | 0,2597 | 0,0665 | 107,0267 | 0,8305 |
| Czech Republic | 13 | 1975,4 | 3,286 | 1,0024 | 0,3657 | 947,46  | 861,33  | 1550,39 | 0,668 | 0,3509 | 0,0994 | 36,0606  | 0,9181 |

|                |    |        |       |        |        |         |         |         |       |        |        |          |        |
|----------------|----|--------|-------|--------|--------|---------|---------|---------|-------|--------|--------|----------|--------|
| Czech Republic | 13 | 1868,6 | 3,257 | 0,9241 | 0,3309 | 1033,59 | 775,20  | 1550,39 | 1,167 | 0,2722 | 0,1013 | 58,4969  | 0,8671 |
| Czech Republic | 13 | 1927,1 | 3,219 | 1,1763 | 0,5399 | 1291,99 | 947,46  | 1722,66 | 1,491 | 0,3069 | 0,0891 | 7,2736   | 0,9010 |
| Czech Republic | 13 | 1927,1 | 3,298 | 1,0359 | 0,5515 | 1119,73 | 775,20  | 1636,52 | 1,049 | 0,2022 | 0,1292 | 12,2659  | 0,8596 |
| Czech Republic | 13 | 1792,7 | 3,203 | 1,2115 | 0,4296 | 1033,59 | 861,33  | 1636,52 | 1,574 | 0,2899 | 0,0966 | 117,7135 | 0,8696 |
| Czech Republic | 13 | 1837,5 | 3,120 | 1,1588 | 0,3773 | 1119,73 | 1033,59 | 1722,66 | 1,091 | 0,2626 | 0,1212 | 124,9466 | 0,8333 |
| Czech Republic | 13 | 1792,7 | 3,289 | 1,2466 | 0,4238 | 1119,73 | 775,20  | 1636,52 | 1,010 | 0,3738 | 0,1262 | 142,7447 | 0,8832 |
| Czech Republic | 13 | 1703,0 | 2,660 | 0,9481 | 0,4470 | 1205,86 | 947,46  | 1464,26 | 1,277 | 0,1914 | 0,0926 | 145,8619 | 0,8210 |
| Czech Republic | 13 | 1523,8 | 2,979 | 1,1061 | 0,3309 | 1033,59 | 775,20  | 1378,13 | 1,392 | 0,2895 | 0,1526 | 195,9648 | 0,8579 |
| Czech Republic | 13 | 1882,3 | 3,406 | 1,2290 | 0,5050 | 689,06  | 602,93  | 1550,39 | 1,765 | 0,2844 | 0,0853 | 239,8447 | 0,9194 |
| Czech Republic | 13 | 1927,1 | 3,288 | 1,1763 | 0,4470 | 947,46  | 861,33  | 1636,52 | 1,045 | 0,2277 | 0,0842 | 247,8846 | 0,8564 |
| Czech Republic | 13 | 1972,0 | 3,245 | 1,1588 | 0,5457 | 947,46  | 861,33  | 1722,66 | 0,973 | 0,2663 | 0,1055 | 308,7615 | 0,8794 |
| Czech Republic | 14 | 2092,3 | 3,821 | 1,3173 | 0,5863 | 689,06  | 430,66  | 1464,26 | 1,762 | 0,3111 | 0,0667 | 25,1994  | 0,9333 |
| Czech Republic | 14 | 2172,8 | 2,929 | 1,2314 | 0,3019 | 1205,86 | 947,46  | 1550,39 | 1,122 | 0,3791 | 0,0758 | 38,8063  | 0,7773 |
| Czech Republic | 14 | 2011,9 | 3,661 | 1,1782 | 0,4122 | 775,20  | 602,93  | 1550,39 | 1,471 | 0,3218 | 0,0743 | 65,5673  | 0,8911 |
| Czech Republic | 14 | 2092,3 | 3,618 | 1,0996 | 0,5224 | 861,33  | 689,06  | 1722,66 | 1,849 | 0,2169 | 0,0741 | 77,2063  | 0,9259 |
| Czech Republic | 14 | 1931,4 | 3,438 | 1,1333 | 0,5573 | 861,33  | 689,06  | 1464,26 | 1,723 | 0,2103 | 0,0821 | 87,1851  | 0,8872 |
| Czech Republic | 15 | 2414,2 | 3,346 | 0,9599 | 0,2961 | 1291,99 | 1033,59 | 1722,66 | 1,768 | 0,4451 | 0,0976 | 35,6020  | 0,8354 |
| Czech Republic | 15 | 2253,3 | 3,150 | 1,0310 | 0,4470 | 1205,86 | 1033,59 | 1636,52 | 1,635 | 0,2655 | 0,1130 | 40,1125  | 0,8927 |
| Czech Republic | 15 | 2092,3 | 2,959 | 0,9421 | 0,4586 | 1119,73 | 947,46  | 1464,26 | 1,543 | 0,2174 | 0,0932 | 76,3530  | 0,8385 |
| Czech Republic | 15 | 2253,3 | 3,301 | 0,9776 | 0,3657 | 1119,73 | 861,33  | 1550,39 | 1,456 | 0,4012 | 0,0958 | 141,9610 | 0,8922 |
| Czech Republic | 15 | 2333,8 | 2,909 | 0,9421 | 0,2496 | 1119,73 | 947,46  | 1464,26 | 1,470 | 0,2360 | 0,1118 | 145,3163 | 0,7329 |
| Czech Republic | 15 | 1931,4 | 2,717 | 0,8888 | 0,3599 | 1205,86 | 947,46  | 1464,26 | 1,424 | 0,1842 | 0,1579 | 151,8759 | 0,7763 |
| Czech Republic | 16 | 1688,3 | 2,894 | 0,9595 | 0,5166 | 1033,59 | 861,33  | 1378,13 | 1,276 | 0,1524 | 0,0976 | 8,1966   | 0,9024 |
| Czech Republic | 16 | 1841,8 | 2,872 | 1,2130 | 0,4470 | 1119,73 | 861,33  | 1550,39 | 1,036 | 0,1250 | 0,1010 | 20,6077  | 0,7356 |
| Czech Republic | 16 | 1688,3 | 2,463 | 1,1044 | 0,1045 | 1205,86 | 947,46  | 1464,26 | 1,282 | 0,1323 | 0,1164 | 34,7777  | 0,7143 |
| Czech Republic | 16 | 1739,4 | 2,984 | 0,9595 | 0,4296 | 1033,59 | 775,20  | 1464,26 | 1,445 | 0,1402 | 0,0976 | 45,4356  | 0,8476 |
| Czech Republic | 16 | 1841,8 | 3,049 | 1,0138 | 0,3483 | 1033,59 | 775,20  | 1378,13 | 1,407 | 0,1329 | 0,0983 | 66,7109  | 0,8324 |
| Czech Republic | 16 | 1790,6 | 3,138 | 0,9776 | 0,4934 | 1033,59 | 775,20  | 1464,26 | 1,216 | 0,1617 | 0,0958 | 100,9720 | 0,8802 |
| Czech Republic | 16 | 1739,4 | 2,822 | 0,9957 | 0,4644 | 1119,73 | 861,33  | 1464,26 | 1,307 | 0,1520 | 0,1228 | 105,5753 | 0,8480 |
| Czech Republic | 16 | 1739,4 | 2,806 | 0,9595 | 0,4180 | 1119,73 | 775,20  | 1378,13 | 1,036 | 0,1402 | 0,1159 | 114,0448 | 0,8415 |
| Czech Republic | 16 | 1688,3 | 2,769 | 1,0863 | 0,4180 | 1119,73 | 775,20  | 1378,13 | 1,119 | 0,1290 | 0,1075 | 122,3924 | 0,7742 |

|                |    |        |       |        |        |         |         |         |       |        |        |          |        |
|----------------|----|--------|-------|--------|--------|---------|---------|---------|-------|--------|--------|----------|--------|
| Czech Republic | 16 | 1739,4 | 2,621 | 1,0319 | 0,5283 | 1119,73 | 1033,59 | 1464,26 | 1,458 | 0,1073 | 0,0734 | 130,8038 | 0,8362 |
| Czech Republic | 16 | 1637,1 | 3,069 | 1,1406 | 0,5050 | 1033,59 | 689,06  | 1464,26 | 1,397 | 0,1744 | 0,1077 | 141,3457 | 0,8718 |
| Czech Republic | 16 | 1637,1 | 3,100 | 0,9776 | 0,5108 | 775,20  | 689,06  | 1378,13 | 0,945 | 0,1437 | 0,0898 | 144,4978 | 0,9102 |
| Czech Republic | 17 | 2822,8 | 3,465 | 1,2634 | 0,2206 | 1722,66 | 1378,13 | 2411,72 | 1,549 | 0,5530 | 0,0876 | 13,9320  | 0,8203 |
| Czech Republic | 17 | 2343,5 | 3,573 | 1,2066 | 0,3889 | 1550,39 | 1291,99 | 2153,32 | 1,448 | 0,4348 | 0,0773 | 28,0671  | 0,8164 |
| Czech Republic | 17 | 2290,2 | 3,355 | 1,2208 | 0,2438 | 1636,52 | 1291,99 | 2067,19 | 1,476 | 0,5024 | 0,0861 | 36,6701  | 0,7847 |
| Czech Republic | 17 | 2237,0 | 3,102 | 1,1214 | 0,1974 | 1550,39 | 1291,99 | 1981,06 | 1,443 | 0,5233 | 0,1088 | 44,3443  | 0,7772 |
| Czech Republic | 17 | 2343,5 | 3,649 | 1,0646 | 0,4063 | 1378,13 | 1205,86 | 2067,19 | 1,943 | 0,1703 | 0,0659 | 48,7677  | 0,7747 |
| Czech Republic | 17 | 2343,5 | 3,452 | 1,0363 | 0,3019 | 1550,39 | 1378,13 | 2153,32 | 1,618 | 0,5254 | 0,0734 | 58,8161  | 0,8927 |
| Czech Republic | 17 | 2237,0 | 3,454 | 0,8375 | 0,3947 | 1378,13 | 1205,86 | 1981,06 | 1,746 | 0,1042 | 0,0694 | 69,9211  | 0,7431 |
| Czech Republic | 17 | 2609,8 | 3,551 | 1,1356 | 0,3657 | 1550,39 | 1205,86 | 2067,19 | 1,829 | 0,3897 | 0,0718 | 87,4812  | 0,8154 |
| Czech Republic | 17 | 2290,2 | 3,271 | 1,0930 | 0,2554 | 1464,26 | 1205,86 | 1894,92 | 1,578 | 0,5080 | 0,0749 | 93,7622  | 0,8182 |
| Czech Republic | 17 | 2503,3 | 3,636 | 1,2066 | 0,3541 | 1550,39 | 1291,99 | 2239,45 | 1,649 | 0,5121 | 0,0773 | 113,1102 | 0,8889 |
| Czech Republic | 17 | 2290,2 | 3,306 | 1,2634 | 0,2844 | 1636,52 | 1378,13 | 2153,32 | 1,484 | 0,5576 | 0,0922 | 137,0848 | 0,8802 |
| Czech Republic | 17 | 2343,5 | 3,251 | 1,2208 | 0,2206 | 1636,52 | 1378,13 | 2153,32 | 1,319 | 0,6048 | 0,1238 | 154,8132 | 0,8714 |
| Czech Republic | 17 | 2237,0 | 3,234 | 1,1782 | 0,3541 | 1464,26 | 1291,99 | 1981,06 | 1,561 | 0,3861 | 0,0594 | 159,6256 | 0,7921 |
| Czech Republic | 17 | 2396,7 | 3,401 | 1,2350 | 0,2554 | 1636,52 | 1378,13 | 2153,32 | 1,567 | 0,5498 | 0,0900 | 188,1281 | 0,8578 |
| Czech Republic | 18 | 2414,2 | 3,546 | 1,0890 | 0,4180 | 1205,86 | 861,33  | 1722,66 | 1,564 | 0,4032 | 0,0914 | 24,0152  | 0,9032 |
| Czech Republic | 18 | 2253,3 | 3,463 | 1,0527 | 0,3599 | 1291,99 | 1033,59 | 1808,79 | 1,661 | 0,4778 | 0,0722 | 47,6589  | 0,9111 |
| Czech Republic | 18 | 2655,7 | 3,523 | 1,2161 | 0,2961 | 1378,13 | 1119,73 | 1894,92 | 1,576 | 0,5529 | 0,1442 | 93,0365  | 0,8654 |
| Czech Republic | 18 | 2897,1 | 3,295 | 1,1253 | 0,6269 | 1291,99 | 1119,73 | 1808,79 | 1,395 | 0,1658 | 0,0984 | 110,0568 | 0,8342 |
| Czech Republic | 18 | 2414,2 | 3,262 | 1,0408 | 0,2902 | 1378,13 | 1119,73 | 1808,79 | 1,548 | 0,5506 | 0,1011 | 21,8558  | 0,8876 |
| Czech Republic | 19 | 1931,4 | 2,252 | 1,0251 | 0,2670 | 1119,73 | 1033,59 | 1378,13 | 1,298 | 0,1193 | 0,1023 | 23,8004  | 0,7500 |
| Czech Republic | 19 | 1770,4 | 2,095 | 0,9871 | 0,3715 | 1119,73 | 1033,59 | 1291,99 | 1,307 | 0,1775 | 0,0947 | 37,5989  | 0,7456 |
| Czech Republic | 19 | 1770,4 | 2,403 | 0,8100 | 0,3193 | 1119,73 | 1033,59 | 1378,13 | 1,319 | 0,1367 | 0,0791 | 74,0194  | 0,7122 |
| Czech Republic | 19 | 1609,5 | 2,685 | 0,9221 | 0,2844 | 1119,73 | 947,46  | 1464,26 | 1,524 | 0,2025 | 0,0886 | 45,3021  | 0,7468 |
| Czech Republic | 19 | 1770,4 | 2,222 | 1,1411 | 0,2728 | 1119,73 | 1033,59 | 1378,13 | 1,283 | 0,2398 | 0,1531 | 94,9290  | 0,6531 |
| Czech Republic | 19 | 1850,9 | 1,973 | 1,0604 | 0,1219 | 1119,73 | 1033,59 | 1378,13 | 1,290 | 0,1703 | 0,1154 | 99,2305  | 0,5110 |
| Czech Republic | 19 | 1690,0 | 2,511 | 0,9305 | 0,2380 | 1205,86 | 1033,59 | 1464,26 | 1,487 | 0,1824 | 0,0692 | 13,8043  | 0,7736 |
| Czech Republic | 19 | 1690,0 | 3,051 | 0,9305 | 0,2728 | 1119,73 | 602,93  | 1464,26 | 1,455 | 0,1572 | 0,0818 | 47,4674  | 0,8113 |
| Czech Republic | 20 | 2333,8 | 3,884 | 1,1927 | 0,3773 | 1205,86 | 1033,59 | 1981,06 | 1,859 | 0,3627 | 0,0931 | 15,9231  | 0,8431 |

|                |    |        |       |        |        |         |         |         |       |        |        |           |        |
|----------------|----|--------|-------|--------|--------|---------|---------|---------|-------|--------|--------|-----------|--------|
| Czech Republic | 20 | 2253,3 | 3,796 | 1,0658 | 0,4934 | 1291,99 | 1033,59 | 2067,19 | 1,897 | 0,2088 | 0,0989 | 23,9978   | 0,8516 |
| Czech Republic | 20 | 2414,2 | 3,758 | 1,1419 | 0,5399 | 1291,99 | 689,06  | 1894,92 | 1,880 | 0,2041 | 0,1071 | 30,4297   | 0,8061 |
| Czech Republic | 20 | 2011,9 | 3,773 | 1,3703 | 0,4470 | 1119,73 | 947,46  | 1894,92 | 1,790 | 0,3191 | 0,1149 | 72,7423   | 0,7787 |
| Czech Republic | 20 | 2253,3 | 4,023 | 1,1927 | 0,5399 | 1205,86 | 775,20  | 2153,32 | 1,817 | 0,2108 | 0,1275 | 76,6142   | 0,7990 |
| Czech Republic | 20 | 2253,3 | 3,938 | 1,2434 | 0,4702 | 1205,86 | 1033,59 | 2067,19 | 1,923 | 0,3568 | 0,1315 | 105,3896  | 0,9108 |
| Czech Republic | 20 | 2092,3 | 3,958 | 1,1165 | 0,5108 | 1119,73 | 516,80  | 1894,92 | 2,036 | 0,2670 | 0,1152 | 124,7318  | 0,9005 |
| Czech Republic | 20 | 2172,8 | 3,902 | 1,3957 | 0,5805 | 1119,73 | 861,33  | 1981,06 | 1,789 | 0,1667 | 0,0875 | 160,0319  | 0,7708 |
| Scotland       | 21 | 2579,7 | 3,203 | 0,9990 | 0,2240 | 1687,50 | 1312,50 | 2062,50 | 1,617 | 0,4545 | 0,0909 | 89,0453   | 0,8128 |
| Scotland       | 21 | 2521,7 | 3,120 | 0,9701 | 0,4000 | 1593,75 | 1312,50 | 2062,50 | 1,366 | 0,1167 | 0,0833 | 92,1120   | 0,7167 |
| Scotland       | 21 | 2260,9 | 3,246 | 0,9556 | 0,3680 | 1500,00 | 1218,75 | 1968,75 | 1,462 | 0,3202 | 0,0899 | 368,7413  | 0,8427 |
| Scotland       | 21 | 2318,8 | 2,818 | 0,9266 | 0,5333 | 1500,00 | 1312,50 | 1875,00 | 1,419 | 0,0751 | 0,0289 | 371,0987  | 0,7861 |
| Scotland       | 21 | 2541,5 | 3,227 | 1,0622 | 0,6187 | 1593,75 | 1312,50 | 2062,50 | 1,779 | 0,0960 | 0,0707 | 55,8933   | 0,8636 |
| Scotland       | 21 | 2664,5 | 3,271 | 1,1803 | 0,6293 | 1593,75 | 1312,50 | 2062,50 | 1,675 | 0,1273 | 0,0636 | 169,9573  | 0,8364 |
| Scotland       | 21 | 2582,5 | 3,426 | 1,0454 | 0,2560 | 1593,75 | 1218,75 | 2156,25 | 1,386 | 0,4872 | 0,0923 | 176,5280  | 0,8564 |
| Scotland       | 21 | 2664,5 | 3,355 | 0,9611 | 0,5653 | 1687,50 | 1406,25 | 2156,25 | 1,702 | 0,1173 | 0,0726 | 424,8213  | 0,7989 |
| Scotland       | 21 | 2500,5 | 3,259 | 1,0319 | 0,5973 | 1593,75 | 1406,25 | 2062,50 | 1,403 | 0,1042 | 0,0521 | 68,7040   | 0,8177 |
| Scotland       | 21 | 2377,5 | 3,063 | 0,9429 | 0,5067 | 1593,75 | 1406,25 | 2062,50 | 1,347 | 0,1257 | 0,0857 | 258,9280  | 0,7943 |
| Scotland       | 21 | 2295,5 | 3,354 | 0,8896 | 0,2667 | 1500,00 | 1312,50 | 2062,50 | 1,615 | 0,5663 | 0,0904 | 299,2853  | 0,9398 |
| Scotland       | 21 | 2418,5 | 3,176 | 0,9459 | 0,5813 | 1687,50 | 1406,25 | 2156,25 | 1,570 | 0,1023 | 0,0682 | 67,7387   | 0,8580 |
| Scotland       | 21 | 2459,5 | 3,213 | 0,9291 | 0,5227 | 1593,75 | 1500,00 | 2156,25 | 1,471 | 0,1098 | 0,0636 | 134,7147  | 0,8092 |
| Scotland       | 22 | 3238,3 | 4,121 | 0,9558 | 0,3733 | 1968,75 | 1593,75 | 3000,00 | 2,290 | 0,0730 | 0,0506 | 53,6960   | 0,8539 |
| Scotland       | 22 | 3402,3 | 4,532 | 0,9440 | 0,5653 | 1687,50 | 1218,75 | 3281,25 | 2,394 | 0,1591 | 0,0625 | 260,0320  | 0,9091 |
| Scotland       | 22 | 3217,4 | 3,762 | 1,0004 | 0,4800 | 1593,75 | 1218,75 | 2437,50 | 0,926 | 0,0588 | 0,0160 | 26,5760   | 0,8128 |
| Scotland       | 22 | 2910,4 | 3,610 | 1,0627 | 0,5653 | 1875,00 | 1593,75 | 2531,25 | 1,816 | 0,1364 | 0,0707 | 1168,6453 | 0,8788 |
| Scotland       | 22 | 2500,5 | 3,254 | 0,8784 | 0,4267 | 1687,50 | 1500,00 | 2250,00 | 1,608 | 0,1098 | 0,0671 | 1175,3280 | 0,8171 |
| Scotland       | 22 | 3115,4 | 3,710 | 1,0085 | 0,4267 | 1593,75 | 1406,25 | 2531,25 | 1,752 | 0,1170 | 0,0585 | 1199,2160 | 0,7340 |
| Scotland       | 22 | 3156,4 | 3,862 | 0,9326 | 0,5333 | 1781,25 | 1500,00 | 2718,75 | 1,938 | 0,0632 | 0,0460 | 1388,2560 | 0,8448 |
| Scotland       | 23 | 2828,4 | 3,837 | 0,9355 | 0,5760 | 1687,50 | 1406,25 | 2531,25 | 2,068 | 0,0800 | 0,0343 | 214,9173  | 0,8457 |
| Scotland       | 23 | 2746,4 | 3,916 | 0,8665 | 0,5333 | 1593,75 | 1312,50 | 2531,25 | 2,297 | 0,0807 | 0,0373 | 223,3227  | 0,8634 |
| Scotland       | 23 | 2541,5 | 3,917 | 0,9125 | 0,5760 | 1593,75 | 1031,25 | 2343,75 | 1,999 | 0,1000 | 0,0471 | 282,9440  | 0,8765 |
| Scotland       | 23 | 2213,6 | 3,624 | 0,8665 | 0,5387 | 1406,25 | 1125,00 | 2156,25 | 1,897 | 0,0994 | 0,0373 | 335,9680  | 0,8944 |

|          |    |        |       |        |        |         |         |         |       |        |        |           |        |
|----------|----|--------|-------|--------|--------|---------|---------|---------|-------|--------|--------|-----------|--------|
| Scotland | 23 | 2459,5 | 3,913 | 0,9202 | 0,5867 | 1406,25 | 1031,25 | 2343,75 | 2,056 | 0,1170 | 0,0585 | 342,3040  | 0,9298 |
| Scotland | 23 | 2787,4 | 3,847 | 0,8895 | 0,5920 | 1593,75 | 1312,50 | 2531,25 | 1,598 | 0,0788 | 0,0485 | 368,9973  | 0,9030 |
| Scotland | 23 | 2623,5 | 3,914 | 1,0735 | 0,3307 | 1593,75 | 1125,00 | 2343,75 | 1,891 | 0,4450 | 0,0550 | 381,0827  | 0,9050 |
| Scotland | 23 | 2377,5 | 3,738 | 1,1603 | 0,3200 | 1500,00 | 843,75  | 2156,25 | 1,728 | 0,4630 | 0,0370 | 917,1733  | 0,8935 |
| Scotland | 23 | 2336,5 | 3,409 | 1,0844 | 0,3093 | 1687,50 | 1312,50 | 2156,25 | 1,833 | 0,4384 | 0,0345 | 1063,3600 | 0,8522 |
| Scotland | 23 | 2418,5 | 3,366 | 1,0736 | 0,5333 | 1687,50 | 1500,00 | 2343,75 | 1,796 | 0,1000 | 0,0550 | 1223,5093 | 0,7250 |
| Scotland | 23 | 2828,4 | 3,843 | 1,0302 | 0,3040 | 1968,75 | 1593,75 | 2812,50 | 1,996 | 0,4479 | 0,0729 | 1234,0373 | 0,8854 |
| Scotland | 23 | 2582,5 | 3,824 | 1,0953 | 0,2773 | 1781,25 | 1218,75 | 2531,25 | 2,122 | 0,4853 | 0,0392 | 1239,2373 | 0,8775 |
| Scotland | 23 | 2608,7 | 3,542 | 1,4109 | 0,3360 | 1781,25 | 1500,00 | 2343,75 | 1,960 | 0,5492 | 0,0682 | 1390,0960 | 0,9015 |
| Scotland | 24 | 2582,5 | 3,507 | 1,2146 | 0,6987 | 1593,75 | 1406,25 | 2343,75 | 1,782 | 0,1239 | 0,0619 | 408,7573  | 0,8584 |
| Scotland | 24 | 2459,5 | 3,324 | 1,1603 | 0,6987 | 1687,50 | 1406,25 | 2156,25 | 1,710 | 0,0968 | 0,0553 | 433,4560  | 0,8664 |
| Scotland | 24 | 2459,5 | 3,421 | 1,0194 | 0,5813 | 1593,75 | 1406,25 | 2250,00 | 1,849 | 0,1204 | 0,0733 | 449,4987  | 0,8848 |
| Scotland | 24 | 2500,5 | 3,507 | 0,9109 | 0,5813 | 1593,75 | 1312,50 | 2250,00 | 1,813 | 0,1000 | 0,0353 | 459,6960  | 0,9059 |
| Scotland | 24 | 2418,5 | 3,382 | 1,0519 | 0,5547 | 1687,50 | 1312,50 | 2250,00 | 1,670 | 0,0612 | 0,0357 | 552,1067  | 0,8827 |
| Scotland | 24 | 2459,5 | 3,378 | 1,0085 | 0,5600 | 1593,75 | 1406,25 | 2156,25 | 1,519 | 0,0851 | 0,0479 | 644,5920  | 0,8777 |
| Scotland | 24 | 2500,5 | 3,254 | 0,9977 | 0,4960 | 1593,75 | 1406,25 | 2156,25 | 1,656 | 0,0914 | 0,0591 | 657,4133  | 0,8387 |
| Scotland | 24 | 2705,5 | 3,560 | 1,1820 | 0,7253 | 1500,00 | 1312,50 | 2437,50 | 1,536 | 0,0950 | 0,0407 | 715,0773  | 0,9005 |
| Scotland | 24 | 2459,5 | 3,136 | 1,0194 | 0,4480 | 1500,00 | 1406,25 | 2250,00 | 1,380 | 0,0895 | 0,0421 | 717,6427  | 0,8737 |
| Scotland | 24 | 2582,5 | 3,515 | 1,2363 | 0,7733 | 1593,75 | 1312,50 | 2343,75 | 1,781 | 0,0823 | 0,0476 | 764,1600  | 0,8788 |
| Scotland | 24 | 2623,5 | 3,247 | 1,1061 | 0,7253 | 1593,75 | 1406,25 | 2156,25 | 1,690 | 0,1117 | 0,0340 | 902,4853  | 0,9029 |
| Scotland | 24 | 2664,5 | 2,829 | 1,2688 | 0,2613 | 1781,25 | 1593,75 | 2156,25 | 1,412 | 0,5781 | 0,0549 | 1002,6453 | 0,8776 |
| Scotland | 24 | 2664,5 | 3,241 | 1,2363 | 0,7307 | 1593,75 | 1406,25 | 2156,25 | 1,703 | 0,0519 | 0,0346 | 1005,2267 | 0,8139 |
| Scotland | 24 | 2336,5 | 3,163 | 1,0411 | 0,6187 | 1593,75 | 1406,25 | 2062,50 | 1,602 | 0,0923 | 0,0564 | 1061,5040 | 0,8462 |
| Scotland | 24 | 2582,5 | 3,109 | 1,2037 | 0,2347 | 1593,75 | 1406,25 | 2062,50 | 1,382 | 0,5689 | 0,0711 | 1139,0080 | 0,8356 |
| Scotland | 24 | 2664,5 | 3,185 | 1,0085 | 0,6347 | 1593,75 | 1406,25 | 2156,25 | 1,563 | 0,0745 | 0,0319 | 1144,7733 | 0,8564 |
| Scotland | 24 | 2705,5 | 3,047 | 1,1820 | 0,2773 | 1781,25 | 1593,75 | 2250,00 | 1,550 | 0,5430 | 0,0633 | 1182,1227 | 0,8869 |
| Scotland | 24 | 2746,4 | 3,046 | 1,2363 | 0,3627 | 1781,25 | 1593,75 | 2250,00 | 1,525 | 0,4416 | 0,0563 | 1226,6293 | 0,8615 |
| Scotland | 24 | 2377,5 | 3,012 | 1,0085 | 0,6027 | 1593,75 | 1406,25 | 2062,50 | 1,439 | 0,0691 | 0,0372 | 1228,4747 | 0,8085 |
| Scotland | 24 | 2295,5 | 3,080 | 0,9326 | 0,3200 | 1500,00 | 1312,50 | 2062,50 | 1,512 | 0,0805 | 0,0575 | 1230,5653 | 0,7586 |
| Scotland | 24 | 2582,5 | 3,092 | 1,1603 | 0,2773 | 1781,25 | 1593,75 | 2250,00 | 1,428 | 0,4722 | 0,0370 | 1254,4053 | 0,8519 |
| Scotland | 24 | 2623,5 | 3,103 | 1,1820 | 0,4160 | 1687,50 | 1500,00 | 2250,00 | 1,696 | 0,3937 | 0,0452 | 1300,6027 | 0,8824 |



|          |    |        |       |        |        |         |         |         |       |        |        |           |        |
|----------|----|--------|-------|--------|--------|---------|---------|---------|-------|--------|--------|-----------|--------|
| Scotland | 24 | 2459,5 | 3,131 | 1,0519 | 0,6720 | 1687,50 | 1500,00 | 2156,25 | 1,452 | 0,1020 | 0,0663 | 1307,5840 | 0,9082 |
| Scotland | 24 | 2787,4 | 3,314 | 1,2254 | 0,3573 | 1687,50 | 1500,00 | 2250,00 | 1,669 | 0,4236 | 0,0568 | 1348,6933 | 0,8035 |
| Scotland | 24 | 2746,4 | 3,211 | 1,0519 | 0,6507 | 1593,75 | 1406,25 | 2156,25 | 1,487 | 0,0765 | 0,0459 | 1352,7947 | 0,8163 |
| Scotland | 25 | 2500,5 | 3,562 | 1,1812 | 0,3040 | 1593,75 | 1312,50 | 2343,75 | 1,890 | 0,5068 | 0,0724 | 238,9760  | 0,9050 |
| Scotland | 25 | 2377,5 | 3,375 | 0,9886 | 0,5333 | 1500,00 | 1312,50 | 2156,25 | 1,733 | 0,1957 | 0,0598 | 325,1947  | 0,8641 |
| Scotland | 25 | 2254,5 | 3,251 | 0,6933 | 0,3093 | 1500,00 | 1312,50 | 2062,50 | 1,952 | 0,1318 | 0,0775 | 601,1040  | 0,7442 |
| Scotland | 25 | 2336,5 | 3,225 | 0,9758 | 0,2133 | 1593,75 | 1312,50 | 2062,50 | 1,661 | 0,4560 | 0,0879 | 611,1627  | 0,7802 |
| Scotland | 25 | 2459,5 | 3,406 | 1,1041 | 0,3947 | 1500,00 | 1312,50 | 2156,25 | 1,649 | 0,2621 | 0,0388 | 616,7253  | 0,7864 |
| Scotland | 25 | 2500,5 | 3,397 | 0,9886 | 0,4107 | 1500,00 | 1312,50 | 2156,25 | 1,520 | 0,2865 | 0,0865 | 629,3013  | 0,8324 |
| Scotland | 25 | 2500,5 | 3,362 | 1,0271 | 0,5120 | 1500,00 | 1218,75 | 2156,25 | 1,473 | 0,1562 | 0,0521 | 674,4800  | 0,8073 |
| Scotland | 25 | 2459,5 | 3,390 | 1,0656 | 0,3253 | 1500,00 | 1218,75 | 2062,50 | 1,638 | 0,2965 | 0,0503 | 677,6373  | 0,7387 |
| Scotland | 25 | 2418,5 | 3,397 | 0,9372 | 0,4533 | 1500,00 | 1312,50 | 2156,25 | 1,618 | 0,1379 | 0,0517 | 685,8613  | 0,7816 |
| Scotland | 25 | 2459,5 | 3,631 | 1,2599 | 0,4373 | 1593,75 | 1218,75 | 2250,00 | 1,851 | 0,4170 | 0,0511 | 189,0240  | 0,8553 |
| Scotland | 25 | 2582,5 | 3,640 | 1,1851 | 0,4693 | 1500,00 | 1218,75 | 2156,25 | 1,766 | 0,2613 | 0,0360 | 195,6907  | 0,7928 |
| Scotland | 25 | 2377,5 | 3,621 | 1,2385 | 0,4213 | 1593,75 | 1218,75 | 2156,25 | 1,703 | 0,3333 | 0,0519 | 252,4053  | 0,8139 |
| Scotland | 25 | 2377,5 | 3,316 | 1,1638 | 0,5120 | 1500,00 | 1218,75 | 2062,50 | 0,921 | 0,0596 | 0,0459 | 430,6187  | 0,7294 |
| Scotland | 25 | 2500,5 | 3,652 | 1,2919 | 0,4480 | 1500,00 | 1218,75 | 2156,25 | 1,623 | 0,3760 | 0,0579 | 579,5733  | 0,8388 |
| Scotland | 26 | 2377,5 | 3,085 | 0,9886 | 0,2400 | 1500,00 | 1406,25 | 2062,50 | 1,600 | 0,0543 | 0,0217 | 612,7520  | 0,7337 |
| Scotland | 26 | 2418,5 | 3,166 | 1,1298 | 0,6080 | 1406,25 | 1218,75 | 1968,75 | 1,465 | 0,0900 | 0,0474 | 614,9867  | 0,8246 |
| Scotland | 26 | 2418,5 | 3,464 | 1,1555 | 0,5707 | 1406,25 | 1125,00 | 1968,75 | 1,676 | 0,1065 | 0,0278 | 626,0747  | 0,8611 |
| Scotland | 26 | 2500,5 | 3,435 | 1,1170 | 0,5813 | 1406,25 | 1218,75 | 1968,75 | 1,811 | 0,1394 | 0,0385 | 630,8053  | 0,8606 |
| Scotland | 26 | 2377,5 | 3,580 | 1,1427 | 0,5227 | 1312,50 | 1125,00 | 2062,50 | 1,497 | 0,0892 | 0,0469 | 641,7227  | 0,8169 |
| Scotland | 26 | 2459,5 | 3,572 | 1,1555 | 0,4373 | 1406,25 | 1218,75 | 2156,25 | 1,775 | 0,0741 | 0,0463 | 658,9120  | 0,8009 |
| Scotland | 27 | 2105,3 | 2,629 | 0,9396 | 0,5440 | 1406,25 | 1218,75 | 1687,50 | 1,506 | 0,1657 | 0,0629 | 180,5547  | 0,8343 |
| Scotland | 27 | 2263,2 | 2,794 | 1,0143 | 0,5813 | 1406,25 | 1312,50 | 1781,25 | 1,360 | 0,1746 | 0,0635 | 186,4320  | 0,8677 |
| Scotland | 27 | 2157,9 | 2,613 | 1,1745 | 0,3413 | 1406,25 | 1218,75 | 1687,50 | 1,491 | 0,3881 | 0,0457 | 229,1307  | 0,7991 |
| Scotland | 27 | 2368,4 | 2,602 | 1,1211 | 0,3093 | 1406,25 | 1312,50 | 1687,50 | 1,405 | 0,5571 | 0,0667 | 284,8747  | 0,9143 |
| Scotland | 27 | 2157,9 | 2,515 | 1,1424 | 0,3093 | 1406,25 | 1218,75 | 1687,50 | 1,472 | 0,4366 | 0,0329 | 292,0800  | 0,8263 |
| Scotland | 27 | 2210,5 | 2,683 | 1,0357 | 0,2720 | 1406,25 | 1312,50 | 1781,25 | 1,430 | 0,4041 | 0,0363 | 304,9973  | 0,8135 |
| Scotland | 27 | 2263,2 | 2,700 | 1,1745 | 0,2933 | 1406,25 | 1218,75 | 1781,25 | 1,420 | 0,5251 | 0,0731 | 313,8773  | 0,8858 |
| Scotland | 27 | 2315,8 | 2,647 | 1,2278 | 0,2880 | 1406,25 | 1312,50 | 1781,25 | 1,401 | 0,5546 | 0,0786 | 373,4453  | 0,8821 |

|          |    |        |       |        |        |         |         |         |       |        |        |           |        |
|----------|----|--------|-------|--------|--------|---------|---------|---------|-------|--------|--------|-----------|--------|
| Scotland | 27 | 2526,3 | 2,756 | 1,2492 | 0,2667 | 1500,00 | 1312,50 | 1781,25 | 1,475 | 0,5579 | 0,1073 | 433,7333  | 0,8627 |
| Scotland | 27 | 2315,8 | 3,511 | 1,0784 | 0,7627 | 1406,25 | 1125,00 | 2062,50 | 0,718 | 0,0697 | 0,0448 | 437,9627  | 0,9403 |
| Scotland | 27 | 2368,4 | 2,826 | 1,1638 | 0,3360 | 1406,25 | 1312,50 | 1781,25 | 1,478 | 0,3825 | 0,0553 | 441,4240  | 0,8295 |
| Scotland | 27 | 2315,8 | 2,854 | 1,2492 | 0,3947 | 1406,25 | 1218,75 | 1781,25 | 1,351 | 0,4206 | 0,0601 | 483,6587  | 0,8755 |
| Scotland | 27 | 2157,9 | 2,677 | 1,2599 | 0,3413 | 1406,25 | 1218,75 | 1781,25 | 1,475 | 0,4746 | 0,0551 | 564,6187  | 0,8686 |
| Scotland | 27 | 2315,8 | 2,642 | 1,0997 | 0,2720 | 1406,25 | 1312,50 | 1781,25 | 1,338 | 0,5437 | 0,0680 | 576,7147  | 0,9126 |
| Scotland | 27 | 2263,2 | 2,746 | 1,2065 | 0,3787 | 1406,25 | 1312,50 | 1781,25 | 1,381 | 0,5378 | 0,0711 | 607,0560  | 0,9200 |
| Scotland | 28 | 3361,3 | 4,114 | 1,0647 | 0,2720 | 1968,75 | 1593,75 | 3000,00 | 1,650 | 0,4774 | 0,0704 | 459,2213  | 0,8794 |
| Scotland | 28 | 3074,4 | 4,161 | 1,0005 | 0,3840 | 1593,75 | 1406,25 | 2906,25 | 2,370 | 0,3102 | 0,0588 | 469,0667  | 0,8770 |
| Scotland | 28 | 3156,4 | 3,792 | 0,8812 | 0,5653 | 1968,75 | 1687,50 | 2718,75 | 2,321 | 0,1220 | 0,0671 | 584,4267  | 0,8902 |
| Scotland | 28 | 3197,4 | 4,085 | 1,0923 | 0,6080 | 1687,50 | 1500,00 | 3000,00 | 2,341 | 0,0784 | 0,0539 | 683,2800  | 0,8431 |
| Scotland | 28 | 3156,4 | 2,735 | 1,0556 | 0,0373 | 1687,50 | 1500,00 | 2250,00 | 1,362 | 0,0711 | 0,0558 | 694,4853  | 0,7107 |
| Scotland | 28 | 2828,4 | 3,732 | 0,9362 | 0,4640 | 1593,75 | 1406,25 | 2625,00 | 2,024 | 0,1257 | 0,0686 | 697,0400  | 0,8057 |
| Scotland | 28 | 3320,3 | 4,002 | 1,0372 | 0,5547 | 1781,25 | 1593,75 | 3000,00 | 1,719 | 0,0619 | 0,0309 | 1015,1467 | 0,8299 |
| Scotland | 28 | 3238,3 | 3,918 | 0,9454 | 0,5973 | 1968,75 | 1687,50 | 2812,50 | 1,878 | 0,1136 | 0,0568 | 1027,6533 | 0,8920 |
| Scotland | 28 | 3443,3 | 4,383 | 0,9930 | 0,6453 | 1875,00 | 1593,75 | 3187,50 | 2,497 | 0,0865 | 0,0486 | 1160,6880 | 0,8865 |
| Scotland | 28 | 3156,4 | 3,311 | 0,9476 | 0,5707 | 1687,50 | 1593,75 | 2437,50 | 1,475 | 0,0678 | 0,0452 | 1163,1947 | 0,8079 |
| Scotland | 28 | 3443,3 | 3,640 | 1,1423 | 0,6720 | 1781,25 | 1593,75 | 2718,75 | 1,679 | 0,0514 | 0,0327 | 1226,1173 | 0,7850 |
| Scotland | 28 | 3197,4 | 3,021 | 1,1749 | 0,3680 | 1687,50 | 1500,00 | 2437,50 | 1,489 | 0,0457 | 0,0274 | 1993,0133 | 0,7032 |
| Scotland | 28 | 3197,4 | 4,053 | 1,0464 | 0,5067 | 1781,25 | 1500,00 | 3000,00 | 2,088 | 0,0667 | 0,0513 | 2053,8187 | 0,8154 |
| Scotland | 28 | 3812,2 | 3,626 | 1,0372 | 0,3840 | 1687,50 | 1500,00 | 2812,50 | 1,425 | 0,0725 | 0,0570 | 2284,7840 | 0,7306 |
| Scotland | 28 | 3402,3 | 3,934 | 0,9821 | 0,5653 | 1687,50 | 1500,00 | 3000,00 | 1,470 | 0,0820 | 0,0546 | 2723,8560 | 0,7978 |
| Scotland | 28 | 3320,3 | 3,867 | 1,1933 | 0,6240 | 1687,50 | 1593,75 | 2812,50 | 1,322 | 0,0852 | 0,0628 | 2882,6880 | 0,7892 |
| Scotland | 28 | 3320,3 | 3,974 | 0,7894 | 0,3200 | 1593,75 | 1406,25 | 2906,25 | 2,302 | 0,1020 | 0,0748 | 3016,2080 | 0,7891 |
| Scotland | 29 | 2418,5 | 3,109 | 1,0647 | 0,5387 | 1500,00 | 1312,50 | 1968,75 | 1,630 | 0,0804 | 0,0503 | 536,4053  | 0,8040 |
| Scotland | 29 | 2459,5 | 3,212 | 1,0280 | 0,4373 | 1593,75 | 1406,25 | 2062,50 | 1,687 | 0,0885 | 0,0625 | 576,2720  | 0,7812 |
| Scotland | 29 | 2582,5 | 3,395 | 1,0647 | 0,5067 | 1593,75 | 1406,25 | 2250,00 | 1,782 | 0,0704 | 0,0503 | 582,9120  | 0,7739 |
| Scotland | 29 | 2869,4 | 3,521 | 1,1382 | 0,6293 | 1593,75 | 1406,25 | 2343,75 | 1,820 | 0,0755 | 0,0519 | 604,9760  | 0,8538 |
| Scotland | 29 | 2418,5 | 3,448 | 1,0774 | 0,4053 | 1593,75 | 1406,25 | 2250,00 | 1,889 | 0,4080 | 0,0498 | 692,1920  | 0,9005 |
| Scotland | 29 | 2705,5 | 3,368 | 1,2332 | 0,7040 | 1593,75 | 1406,25 | 2250,00 | 1,824 | 0,0693 | 0,0476 | 949,9787  | 0,8485 |
| Scotland | 29 | 2500,5 | 3,217 | 0,8957 | 0,5067 | 1593,75 | 1500,00 | 2250,00 | 1,838 | 0,0659 | 0,0419 | 956,3893  | 0,8204 |

|          |    |        |       |        |        |         |         |         |       |        |        |           |        |
|----------|----|--------|-------|--------|--------|---------|---------|---------|-------|--------|--------|-----------|--------|
| Scotland | 29 | 2582,5 | 3,470 | 0,9913 | 0,6347 | 1781,25 | 1500,00 | 2437,50 | 1,909 | 0,0865 | 0,0432 | 1166,8480 | 0,8486 |
| Scotland | 29 | 2705,5 | 3,406 | 1,0005 | 0,6080 | 1687,50 | 1500,00 | 2437,50 | 1,825 | 0,0802 | 0,0588 | 1177,4507 | 0,8235 |
| Scotland | 29 | 2582,5 | 3,494 | 1,1423 | 0,6613 | 1687,50 | 1500,00 | 2343,75 | 2,040 | 0,0751 | 0,0563 | 2054,9920 | 0,7934 |
| Scotland | 29 | 2828,4 | 3,442 | 1,0515 | 0,1067 | 1593,75 | 1500,00 | 2531,25 | 1,647 | 0,0612 | 0,0357 | 2081,0133 | 0,7959 |
| Scotland | 30 | 3197,4 | 4,343 | 0,8917 | 0,4267 | 1687,50 | 1406,25 | 3000,00 | 2,201 | 0,2575 | 0,0539 | 239,5787  | 0,9102 |
| Scotland | 30 | 2992,4 | 4,074 | 0,8147 | 0,4533 | 1781,25 | 1312,50 | 2718,75 | 2,093 | 0,1325 | 0,0530 | 242,2507  | 0,8742 |
| Scotland | 30 | 3279,3 | 4,406 | 0,8587 | 0,4853 | 1687,50 | 1312,50 | 3000,00 | 2,033 | 0,2062 | 0,0625 | 251,6053  | 0,9250 |
| Scotland | 30 | 3320,3 | 4,385 | 1,0128 | 0,5493 | 1875,00 | 1500,00 | 3187,50 | 1,838 | 0,2063 | 0,0476 | 264,6827  | 0,8942 |
| Scotland | 30 | 2910,4 | 4,046 | 0,8807 | 0,5387 | 1687,50 | 1406,25 | 2625,00 | 1,770 | 0,1159 | 0,0488 | 275,4667  | 0,8720 |
| Scotland | 30 | 3689,3 | 4,445 | 0,9030 | 0,3680 | 1875,00 | 1593,75 | 3375,00 | 2,210 | 0,3512 | 0,0357 | 464,1173  | 0,8869 |
| Scotland | 30 | 2951,4 | 3,799 | 0,8952 | 0,3893 | 1687,50 | 1500,00 | 2718,75 | 1,710 | 0,2695 | 0,0299 | 604,9760  | 0,9281 |
| Scotland | 30 | 4181,2 | 4,807 | 0,7926 | 0,4587 | 1875,00 | 1406,25 | 3562,50 | 2,405 | 0,2177 | 0,0680 | 833,1893  | 0,9116 |
| Scotland | 30 | 3976,2 | 4,535 | 0,8952 | 0,5333 | 1875,00 | 1593,75 | 3562,50 | 2,829 | 0,0599 | 0,0299 | 1406,5227 | 0,9162 |
| Scotland | 30 | 3730,2 | 4,520 | 1,1287 | 0,4587 | 2062,50 | 1500,00 | 3375,00 | 2,249 | 0,4265 | 0,0427 | 2074,8373 | 0,9431 |
| Scotland | 30 | 3607,3 | 4,505 | 0,9964 | 0,4107 | 1968,75 | 1500,00 | 3281,25 | 2,538 | 0,4032 | 0,0430 | 3028,3520 | 0,9301 |
| Scotland | 30 | 3478,3 | 4,433 | 1,1491 | 0,5493 | 2062,50 | 1593,75 | 3281,25 | 2,306 | 0,3364 | 0,0514 | 118,1653  | 0,9299 |
| Scotland | 30 | 3594,2 | 4,440 | 1,0342 | 0,4000 | 2062,50 | 1593,75 | 3281,25 | 2,221 | 0,3938 | 0,0466 | 238,9440  | 0,9016 |
| Scotland | 31 | 4173,9 | 4,563 | 0,8006 | 0,1973 | 2437,50 | 1687,50 | 3562,50 | 2,191 | 0,6242 | 0,0805 | 193,8080  | 0,9463 |
| Scotland | 31 | 3710,1 | 4,610 | 0,5284 | 0,2933 | 1875,00 | 1500,00 | 3375,00 | 1,998 | 0,2143 | 0,0408 | 362,6987  | 0,9184 |
| Scotland | 31 | 3768,1 | 4,505 | 0,6416 | 0,3307 | 1875,00 | 1593,75 | 3281,25 | 2,069 | 0,1849 | 0,0504 | 433,1840  | 0,8992 |
| Scotland | 31 | 3826,1 | 4,286 | 0,5014 | 0,2400 | 1875,00 | 1593,75 | 3187,50 | 2,078 | 0,1290 | 0,0645 | 467,3120  | 0,8602 |
| Scotland | 31 | 3536,2 | 4,285 | 0,8141 | 0,4747 | 1781,25 | 1500,00 | 2906,25 | 2,155 | 0,1513 | 0,0658 | 504,1920  | 0,8684 |
| Scotland | 31 | 3478,3 | 4,211 | 0,8387 | 0,4373 | 1875,00 | 1500,00 | 2906,25 | 2,130 | 0,0897 | 0,0449 | 545,3280  | 0,8462 |
| Scotland | 31 | 3420,3 | 4,123 | 0,7396 | 0,4053 | 1781,25 | 1500,00 | 2812,50 | 1,791 | 0,1241 | 0,0584 | 555,3813  | 0,8613 |
| Scotland | 31 | 3362,3 | 4,260 | 0,6634 | 0,3573 | 1687,50 | 1406,25 | 2906,25 | 1,954 | 0,1138 | 0,0569 | 576,6240  | 0,8699 |
| Scotland | 31 | 4463,8 | 4,651 | 0,9760 | 0,2293 | 2812,50 | 1968,75 | 4031,25 | 2,805 | 0,5824 | 0,0714 | 1023,4293 | 0,8956 |
| Scotland | 31 | 3652,2 | 4,495 | 0,8997 | 0,2560 | 2156,25 | 1593,75 | 3375,00 | 2,633 | 0,5000 | 0,0714 | 1029,8560 | 0,9167 |
| Scotland | 31 | 4058,0 | 4,744 | 0,9455 | 0,2720 | 2343,75 | 1593,75 | 3750,00 | 2,290 | 0,5341 | 0,0739 | 1047,1200 | 0,9261 |
| Scotland | 31 | 4463,8 | 4,428 | 0,9150 | 0,1760 | 3000,00 | 2250,00 | 4031,25 | 2,664 | 0,6550 | 0,4035 | 1060,0107 | 0,9181 |
| Scotland | 31 | 4173,9 | 4,721 | 0,5795 | 0,3413 | 2250,00 | 1687,50 | 3750,00 | 2,561 | 0,1574 | 0,0741 | 1064,2827 | 0,8611 |
| Scotland | 31 | 3884,1 | 4,234 | 0,8616 | 0,2080 | 2437,50 | 1687,50 | 3281,25 | 2,169 | 0,5875 | 0,1250 | 1070,5867 | 0,9313 |

|          |    |        |       |        |        |         |         |         |       |        |        |           |        |
|----------|----|--------|-------|--------|--------|---------|---------|---------|-------|--------|--------|-----------|--------|
| Scotland | 31 | 3768,1 | 4,507 | 0,8006 | 0,4160 | 1781,25 | 1593,75 | 3375,00 | 2,054 | 0,1467 | 0,0733 | 1100,8320 | 0,8667 |
| Scotland | 31 | 4637,7 | 4,629 | 0,7764 | 0,3947 | 2812,50 | 2156,25 | 4218,75 | 2,631 | 0,1586 | 0,0621 | 1178,3413 | 0,8000 |
| Scotland | 31 | 3826,1 | 4,230 | 0,9226 | 0,2240 | 2625,00 | 1968,75 | 3468,75 | 2,223 | 0,5465 | 0,0523 | 1909,7813 | 0,8721 |
| Scotland | 31 | 3768,1 | 4,614 | 0,9226 | 0,4160 | 2062,50 | 1500,00 | 3468,75 | 1,955 | 0,3895 | 0,0640 | 1919,6107 | 0,9186 |
| Scotland | 31 | 3768,1 | 4,297 | 0,8921 | 0,1813 | 2437,50 | 1875,00 | 3468,75 | 2,303 | 0,5904 | 0,0783 | 1967,2160 | 0,8976 |
| Scotland | 31 | 4173,9 | 4,383 | 0,8540 | 0,2187 | 2531,25 | 1875,00 | 3656,25 | 2,378 | 0,5786 | 0,0881 | 2041,3600 | 0,9371 |
| Scotland | 31 | 3246,4 | 4,135 | 0,8616 | 0,1707 | 2156,25 | 1687,50 | 3093,75 | 1,843 | 0,6025 | 0,0870 | 2413,7120 | 0,8944 |
| Scotland | 31 | 3768,1 | 4,395 | 0,9607 | 0,2187 | 2437,50 | 1781,25 | 3562,50 | 2,496 | 0,5698 | 0,0726 | 2425,7707 | 0,8939 |
| Scotland | 32 | 2664,5 | 3,619 | 1,1390 | 0,6347 | 1593,75 | 1406,25 | 2437,50 | 2,005 | 0,0991 | 0,0472 | 373,6747  | 0,8774 |
| Scotland | 32 | 2418,5 | 3,496 | 0,8795 | 0,5280 | 1500,00 | 1312,50 | 2156,25 | 1,826 | 0,1037 | 0,0488 | 383,3120  | 0,8963 |
| Scotland | 32 | 2377,5 | 3,178 | 1,0093 | 0,6507 | 1593,75 | 1312,50 | 2062,50 | 1,525 | 0,1064 | 0,0585 | 393,3653  | 0,8723 |
| Scotland | 32 | 2295,5 | 3,469 | 0,9948 | 0,6133 | 1500,00 | 1218,75 | 2062,50 | 1,536 | 0,1027 | 0,0595 | 397,2053  | 0,8595 |
| Scotland | 32 | 2500,5 | 3,266 | 0,8795 | 0,3787 | 1593,75 | 1406,25 | 2156,25 | 1,455 | 0,2622 | 0,0610 | 410,8853  | 0,8537 |
| Scotland | 32 | 2541,5 | 3,445 | 0,9660 | 0,4000 | 1500,00 | 1218,75 | 2062,50 | 1,826 | 0,0722 | 0,0444 | 464,3200  | 0,7778 |
| Scotland | 32 | 3074,4 | 3,909 | 1,0909 | 0,4000 | 1593,75 | 1312,50 | 2625,00 | 1,665 | 0,0784 | 0,0490 | 610,9227  | 0,7941 |
| Scotland | 32 | 2541,5 | 3,265 | 0,9277 | 0,5920 | 1781,25 | 1500,00 | 2343,75 | 1,584 | 0,0867 | 0,0520 | 766,2827  | 0,8786 |
| Scotland | 32 | 2828,4 | 3,513 | 0,9804 | 0,6347 | 1593,75 | 1406,25 | 2343,75 | 1,879 | 0,0984 | 0,0492 | 798,4053  | 0,8743 |
| Scotland | 32 | 2664,5 | 3,787 | 1,0603 | 0,4907 | 1687,50 | 1406,25 | 2531,25 | 1,945 | 0,3434 | 0,0808 | 928,8533  | 0,9192 |
| Scotland | 32 | 2828,4 | 3,823 | 1,0093 | 0,5173 | 1781,25 | 1593,75 | 2812,50 | 2,317 | 0,1217 | 0,0794 | 931,0347  | 0,8624 |
| Scotland | 32 | 2623,5 | 3,392 | 1,2234 | 0,4267 | 1500,00 | 1312,50 | 2156,25 | 1,616 | 0,3755 | 0,0961 | 973,8773  | 0,8341 |
| Scotland | 32 | 2459,5 | 3,583 | 1,0501 | 0,3467 | 1687,50 | 1406,25 | 2343,75 | 1,961 | 0,4490 | 0,0561 | 1002,8320 | 0,9031 |
| Scotland | 32 | 3033,4 | 4,043 | 1,0603 | 0,4160 | 1687,50 | 1406,25 | 2812,50 | 2,237 | 0,1010 | 0,0606 | 1102,7360 | 0,8384 |
| Scotland | 32 | 2500,5 | 3,348 | 1,0093 | 0,5280 | 1687,50 | 1406,25 | 2250,00 | 1,907 | 0,2234 | 0,0532 | 1200,1653 | 0,8883 |
| Scotland | 32 | 2336,5 | 3,298 | 1,0093 | 0,5493 | 1593,75 | 1312,50 | 2156,25 | 1,600 | 0,1905 | 0,0529 | 1215,7760 | 0,9048 |
| Scotland | 32 | 2295,5 | 3,256 | 1,0093 | 0,4960 | 1687,50 | 1406,25 | 2156,25 | 1,621 | 0,2275 | 0,0635 | 1229,7387 | 0,8836 |
| Scotland | 32 | 2418,5 | 3,275 | 0,9175 | 0,4213 | 1687,50 | 1406,25 | 2250,00 | 1,625 | 0,2865 | 0,0468 | 1256,4107 | 0,9006 |
| Scotland | 32 | 2541,5 | 3,597 | 0,9379 | 0,4320 | 1687,50 | 1406,25 | 2437,50 | 1,640 | 0,3391 | 0,0460 | 1264,8747 | 0,9310 |
| Scotland | 32 | 2541,5 | 3,373 | 0,9175 | 0,5173 | 1687,50 | 1500,00 | 2343,75 | 1,622 | 0,0936 | 0,0468 | 1277,7333 | 0,8480 |
| Scotland | 32 | 2582,5 | 3,500 | 0,7646 | 0,5280 | 1593,75 | 1406,25 | 2250,00 | 1,891 | 0,0845 | 0,0493 | 1345,0293 | 0,9366 |
| Scotland | 32 | 2582,5 | 3,413 | 0,9583 | 0,5493 | 1687,50 | 1500,00 | 2250,00 | 1,929 | 0,1292 | 0,0393 | 1351,3387 | 0,8539 |
| Scotland | 33 | 2418,5 | 2,982 | 0,7935 | 0,4640 | 1500,00 | 1312,50 | 1968,75 | 1,608 | 0,0676 | 0,0338 | 3,4347    | 0,8514 |

|          |    |        |       |        |        |         |         |         |       |        |        |          |        |
|----------|----|--------|-------|--------|--------|---------|---------|---------|-------|--------|--------|----------|--------|
| Scotland | 33 | 2500,5 | 3,257 | 0,9970 | 0,6080 | 1500,00 | 1312,50 | 2062,50 | 1,589 | 0,1022 | 0,0591 | 22,8000  | 0,8925 |
| Scotland | 33 | 2541,5 | 3,030 | 1,0513 | 0,6027 | 1593,75 | 1406,25 | 2062,50 | 1,535 | 0,0918 | 0,0510 | 72,8853  | 0,8316 |
| Scotland | 33 | 2664,5 | 2,947 | 1,0920 | 0,6347 | 1500,00 | 1406,25 | 1968,75 | 1,528 | 0,0887 | 0,0542 | 113,4720 | 0,9064 |
| Scotland | 33 | 2541,5 | 2,714 | 1,0241 | 0,5920 | 1500,00 | 1312,50 | 1875,00 | 1,501 | 0,0838 | 0,0471 | 118,7787 | 0,8482 |
| Scotland | 33 | 2664,5 | 2,945 | 1,1259 | 0,6347 | 1500,00 | 1406,25 | 1968,75 | 1,422 | 0,1000 | 0,0619 | 146,4320 | 0,8810 |
| Scotland | 33 | 2541,5 | 3,069 | 1,0648 | 0,4000 | 1500,00 | 1312,50 | 1968,75 | 1,555 | 0,3467 | 0,0452 | 165,6213 | 0,8794 |
| Scotland | 33 | 2459,5 | 2,768 | 0,9495 | 0,5227 | 1500,00 | 1312,50 | 1875,00 | 1,492 | 0,1017 | 0,0565 | 169,8453 | 0,8136 |
| Scotland | 33 | 2541,5 | 2,818 | 0,9428 | 0,5173 | 1500,00 | 1406,25 | 1875,00 | 1,494 | 0,0914 | 0,0514 | 181,0880 | 0,8171 |
| Scotland | 33 | 2541,5 | 2,832 | 0,8139 | 0,4320 | 1500,00 | 1312,50 | 1875,00 | 1,490 | 0,0724 | 0,0526 | 187,8667 | 0,7368 |
| Scotland | 33 | 2582,5 | 2,833 | 1,0513 | 0,6560 | 1500,00 | 1312,50 | 1875,00 | 1,396 | 0,1071 | 0,0510 | 220,9547 | 0,8878 |
| Scotland | 33 | 2295,5 | 3,016 | 0,8817 | 0,4373 | 1500,00 | 1312,50 | 1968,75 | 1,520 | 0,0793 | 0,0488 | 243,4240 | 0,7622 |
| Scotland | 33 | 2377,5 | 3,180 | 0,8681 | 0,5120 | 1500,00 | 1218,75 | 1968,75 | 1,336 | 0,0988 | 0,0370 | 246,8160 | 0,8395 |
| Scotland | 33 | 2418,5 | 3,072 | 0,9495 | 0,5600 | 1500,00 | 1031,25 | 1875,00 | 1,570 | 0,0621 | 0,0339 | 252,2613 | 0,8136 |
| Scotland | 33 | 2459,5 | 2,965 | 0,9563 | 0,5600 | 1500,00 | 1312,50 | 1968,75 | 1,497 | 0,0838 | 0,0391 | 257,9573 | 0,8380 |
| Scotland | 33 | 2418,5 | 2,932 | 0,9495 | 0,4160 | 1500,00 | 1312,50 | 1968,75 | 1,402 | 0,1582 | 0,0339 | 264,8320 | 0,7797 |
| Scotland | 33 | 2418,5 | 2,937 | 0,9224 | 0,4693 | 1500,00 | 1312,50 | 1968,75 | 1,555 | 0,0930 | 0,0407 | 273,0027 | 0,7326 |
| Scotland | 33 | 2623,5 | 2,935 | 0,9021 | 0,4587 | 1500,00 | 1312,50 | 1875,00 | 1,405 | 0,1131 | 0,0357 | 280,0800 | 0,7440 |
| Scotland | 33 | 2459,5 | 3,283 | 0,8953 | 0,5547 | 1500,00 | 1031,25 | 1968,75 | 1,560 | 0,0958 | 0,0479 | 304,5547 | 0,8922 |
| Scotland | 33 | 2500,5 | 3,280 | 0,9021 | 0,4000 | 1500,00 | 1218,75 | 1968,75 | 1,344 | 0,0893 | 0,0595 | 309,1253 | 0,8036 |
| Scotland | 33 | 2295,5 | 2,922 | 0,8614 | 0,4800 | 1500,00 | 1218,75 | 1875,00 | 1,548 | 0,1000 | 0,0563 | 312,4053 | 0,7875 |
| Scotland | 33 | 2500,5 | 3,283 | 1,0513 | 0,4373 | 1500,00 | 1031,25 | 2062,50 | 0,952 | 0,3112 | 0,0510 | 336,5707 | 0,8724 |
| Scotland | 33 | 2459,5 | 3,204 | 0,9021 | 0,5173 | 1500,00 | 1218,75 | 1968,75 | 1,138 | 0,0893 | 0,0417 | 341,3653 | 0,8274 |
| Scotland | 33 | 2541,5 | 3,042 | 1,0648 | 0,3733 | 1593,75 | 1406,25 | 1968,75 | 1,425 | 0,4121 | 0,0553 | 380,7093 | 0,9095 |
| Scotland | 33 | 2418,5 | 2,956 | 1,0038 | 0,5973 | 1500,00 | 1312,50 | 1875,00 | 1,553 | 0,0909 | 0,0535 | 384,7787 | 0,8717 |
| Scotland | 33 | 2459,5 | 3,023 | 0,8681 | 0,4693 | 1500,00 | 1312,50 | 1968,75 | 1,516 | 0,0741 | 0,0370 | 390,4533 | 0,7901 |
| Scotland | 34 | 3095,0 | 3,460 | 0,5835 | 0,3360 | 1500,00 | 1312,50 | 2343,75 | 1,489 | 0,1204 | 0,0648 | 5,7760   | 0,8981 |
| Scotland | 34 | 3475,1 | 4,220 | 0,8603 | 0,5227 | 1687,50 | 1406,25 | 2812,50 | 2,101 | 0,1180 | 0,0435 | 127,2800 | 0,8758 |
| Scotland | 34 | 3583,7 | 4,132 | 0,8362 | 0,4853 | 1687,50 | 1218,75 | 2625,00 | 2,092 | 0,1667 | 0,0385 | 139,7440 | 0,9231 |
| Scotland | 34 | 3095,0 | 4,291 | 0,9024 | 0,3360 | 1593,75 | 1312,50 | 2812,50 | 1,824 | 0,4048 | 0,0655 | 179,1680 | 0,9226 |
| Scotland | 34 | 2986,4 | 3,988 | 0,9204 | 0,4800 | 1687,50 | 1406,25 | 2625,00 | 1,680 | 0,2209 | 0,0523 | 204,6080 | 0,9070 |
| Scotland | 34 | 3312,2 | 4,150 | 0,9024 | 0,5440 | 1593,75 | 1218,75 | 2812,50 | 1,681 | 0,1310 | 0,0476 | 208,2933 | 0,8929 |

|          |    |        |       |        |        |         |         |         |       |        |        |          |        |
|----------|----|--------|-------|--------|--------|---------|---------|---------|-------|--------|--------|----------|--------|
| Scotland | 34 | 3583,7 | 4,155 | 0,8482 | 0,2347 | 1875,00 | 1500,00 | 2906,25 | 2,345 | 0,4340 | 0,0377 | 234,3947 | 0,8050 |
| Scotland | 34 | 3475,1 | 4,239 | 0,8663 | 0,5440 | 1687,50 | 1406,25 | 2812,50 | 2,134 | 0,0745 | 0,0186 | 236,6880 | 0,8634 |
| Scotland | 34 | 3529,4 | 4,170 | 0,8603 | 0,6027 | 1593,75 | 1406,25 | 2906,25 | 1,561 | 0,1125 | 0,0437 | 453,4187 | 0,9187 |
| Scotland | 34 | 3855,2 | 4,313 | 0,8181 | 0,4373 | 1781,25 | 1500,00 | 3000,00 | 1,816 | 0,1699 | 0,0523 | 643,5307 | 0,8693 |
| Scotland | 34 | 3583,7 | 4,200 | 1,1310 | 0,5013 | 1687,50 | 1406,25 | 2812,50 | 2,092 | 0,3081 | 0,0284 | 645,0880 | 0,9052 |
| Scotland | 34 | 3909,5 | 3,731 | 0,7219 | 0,2880 | 1687,50 | 1593,75 | 2812,50 | 1,531 | 0,2000 | 0,0667 | 649,9147 | 0,7852 |
| Scotland | 34 | 3529,4 | 3,849 | 0,6557 | 0,3893 | 1781,25 | 1500,00 | 2718,75 | 1,666 | 0,0902 | 0,0410 | 656,7253 | 0,8443 |
| Scotland | 34 | 3257,9 | 3,389 | 0,6377 | 0,3253 | 1781,25 | 1500,00 | 2343,75 | 1,626 | 0,1186 | 0,0593 | 661,4400 | 0,7966 |
| Scotland | 34 | 3746,6 | 4,355 | 0,8001 | 0,5013 | 1781,25 | 1500,00 | 3093,75 | 1,864 | 0,1074 | 0,0470 | 684,9173 | 0,8792 |
| Scotland | 35 | 2582,5 | 3,348 | 0,8750 | 0,5760 | 1593,75 | 1406,25 | 2250,00 | 1,398 | 0,1043 | 0,0368 | 13,9787  | 0,9264 |
| Scotland | 35 | 2172,6 | 2,615 | 0,8883 | 0,5280 | 1500,00 | 1406,25 | 1875,00 | 1,411 | 0,0909 | 0,0485 | 24,4907  | 0,8364 |
| Scotland | 35 | 2295,5 | 2,861 | 0,9612 | 0,5867 | 1500,00 | 1406,25 | 1875,00 | 1,346 | 0,1167 | 0,0333 | 55,6000  | 0,9111 |
| Scotland | 35 | 2336,5 | 2,676 | 0,8949 | 0,5707 | 1500,00 | 1406,25 | 1875,00 | 1,323 | 0,1325 | 0,0663 | 60,3200  | 0,9157 |
| Scotland | 35 | 2336,5 | 2,813 | 0,9811 | 0,2933 | 1500,00 | 1406,25 | 1968,75 | 1,324 | 0,4754 | 0,0492 | 91,7120  | 0,9235 |
| Scotland | 35 | 2459,5 | 3,124 | 0,9480 | 0,6293 | 1593,75 | 1406,25 | 2062,50 | 1,460 | 0,1534 | 0,0568 | 96,4907  | 0,9375 |
| Scotland | 35 | 2377,5 | 2,554 | 0,9480 | 0,5280 | 1500,00 | 1406,25 | 1875,00 | 1,277 | 0,0904 | 0,0565 | 123,8560 | 0,8588 |
| Scotland | 35 | 2418,5 | 2,943 | 0,8220 | 0,5120 | 1500,00 | 1406,25 | 1968,75 | 1,437 | 0,1176 | 0,0588 | 133,2427 | 0,9020 |
| Scotland | 35 | 2254,5 | 2,607 | 0,8883 | 0,5333 | 1500,00 | 1312,50 | 1875,00 | 1,275 | 0,1205 | 0,0663 | 158,1600 | 0,8614 |
| Scotland | 35 | 2459,5 | 2,855 | 0,8419 | 0,4373 | 1500,00 | 1406,25 | 2062,50 | 1,381 | 0,0955 | 0,0510 | 164,1227 | 0,8790 |
| Scotland | 35 | 2377,5 | 2,902 | 0,9678 | 0,6453 | 1593,75 | 1500,00 | 2062,50 | 1,287 | 0,0994 | 0,0552 | 182,5120 | 0,8950 |
| Scotland | 35 | 2541,5 | 2,953 | 0,9082 | 0,5867 | 1593,75 | 1500,00 | 2062,50 | 1,491 | 0,1353 | 0,0706 | 188,4853 | 0,9000 |
| Scotland | 35 | 2459,5 | 3,048 | 0,8750 | 0,6080 | 1593,75 | 1500,00 | 2062,50 | 1,345 | 0,1402 | 0,0610 | 209,4933 | 0,9146 |
| Scotland | 35 | 2500,5 | 3,045 | 1,0408 | 0,3093 | 1593,75 | 1500,00 | 2062,50 | 1,558 | 0,5155 | 0,0670 | 251,7387 | 0,9072 |
| Scotland | 35 | 2459,5 | 3,045 | 0,9546 | 0,6720 | 1593,75 | 1406,25 | 2062,50 | 1,536 | 0,0843 | 0,0393 | 256,9120 | 0,9270 |
| Scotland | 35 | 2213,6 | 2,399 | 0,9148 | 0,5173 | 1500,00 | 1406,25 | 1781,25 | 1,282 | 0,0882 | 0,0471 | 270,1333 | 0,8706 |
| Scotland | 35 | 2254,5 | 2,539 | 0,9082 | 0,5067 | 1500,00 | 1406,25 | 1875,00 | 1,318 | 0,1118 | 0,0647 | 277,9893 | 0,8412 |
| Scotland | 35 | 2254,5 | 2,698 | 1,0474 | 0,2613 | 1500,00 | 1406,25 | 1875,00 | 1,356 | 0,4923 | 0,1128 | 298,8107 | 0,8821 |
| Scotland | 35 | 2254,5 | 2,608 | 0,9281 | 0,5493 | 1500,00 | 1406,25 | 1875,00 | 1,317 | 0,1098 | 0,0520 | 307,8880 | 0,8671 |
| Scotland | 35 | 2377,5 | 2,907 | 0,8618 | 0,4373 | 1500,00 | 1406,25 | 1968,75 | 1,454 | 0,1615 | 0,0621 | 313,4347 | 0,8323 |
| Scotland | 35 | 2500,5 | 2,990 | 0,9015 | 0,5227 | 1593,75 | 1406,25 | 2062,50 | 1,590 | 0,1369 | 0,0655 | 323,0667 | 0,8750 |
| Scotland | 35 | 2418,5 | 2,623 | 0,9281 | 0,5493 | 1500,00 | 1312,50 | 1781,25 | 1,363 | 0,0925 | 0,0520 | 361,8187 | 0,8728 |

|          |    |        |       |        |        |         |         |         |       |        |        |           |        |
|----------|----|--------|-------|--------|--------|---------|---------|---------|-------|--------|--------|-----------|--------|
| Scotland | 35 | 2418,5 | 2,495 | 0,9082 | 0,5067 | 1500,00 | 1406,25 | 1781,25 | 1,312 | 0,1006 | 0,0414 | 381,6480  | 0,8580 |
| Scotland | 36 | 2929,3 | 3,620 | 0,9605 | 0,5547 | 1687,50 | 1312,50 | 2343,75 | 1,963 | 0,0726 | 0,0447 | 609,4880  | 0,8212 |
| Scotland | 36 | 2621,0 | 3,677 | 1,0122 | 0,4907 | 1406,25 | 1125,00 | 2156,25 | 1,729 | 0,0745 | 0,0532 | 613,0080  | 0,7766 |
| Scotland | 36 | 2621,0 | 3,205 | 0,7953 | 0,0587 | 1593,75 | 1312,50 | 2062,50 | 1,903 | 0,0946 | 0,0743 | 744,8533  | 0,7635 |
| Scotland | 36 | 2723,8 | 3,569 | 1,1981 | 0,6080 | 1500,00 | 1218,75 | 2250,00 | 1,756 | 0,2511 | 0,0538 | 787,5413  | 0,9013 |
| Scotland | 36 | 2723,8 | 3,508 | 1,1774 | 0,7040 | 1593,75 | 1406,25 | 2250,00 | 1,735 | 0,1136 | 0,0773 | 828,9973  | 0,8364 |
| Scotland | 36 | 2826,6 | 3,492 | 1,2600 | 0,3040 | 1687,50 | 1312,50 | 2343,75 | 1,680 | 0,4788 | 0,0424 | 858,9600  | 0,8602 |
| Scotland | 36 | 2518,2 | 3,234 | 1,0225 | 0,4693 | 1406,25 | 1218,75 | 2062,50 | 1,634 | 0,0681 | 0,0471 | 902,6827  | 0,7853 |
| Scotland | 36 | 2518,2 | 3,402 | 0,9812 | 0,4533 | 1406,25 | 1218,75 | 2062,50 | 1,415 | 0,0929 | 0,0710 | 909,3547  | 0,7760 |
| Scotland | 36 | 2621,0 | 3,218 | 1,0535 | 0,4533 | 1406,25 | 1218,75 | 2062,50 | 1,396 | 0,0612 | 0,0408 | 939,2587  | 0,7347 |
| Scotland | 36 | 2672,4 | 3,439 | 1,2187 | 0,3840 | 1593,75 | 1218,75 | 2156,25 | 1,666 | 0,3877 | 0,0529 | 1002,9600 | 0,8458 |
| Scotland | 36 | 2672,4 | 3,644 | 1,2084 | 0,3840 | 1593,75 | 1218,75 | 2250,00 | 1,697 | 0,4779 | 0,0619 | 1029,3813 | 0,9292 |
| Scotland | 36 | 2826,6 | 3,628 | 1,2807 | 0,3840 | 1500,00 | 1218,75 | 2250,00 | 1,590 | 0,3808 | 0,0460 | 1191,6747 | 0,8828 |
| Scotland | 36 | 2723,8 | 3,676 | 1,1568 | 0,3360 | 1500,00 | 1218,75 | 2250,00 | 1,785 | 0,4120 | 0,0417 | 1199,0773 | 0,8194 |
| Scotland | 37 | 2415,4 | 3,390 | 0,9640 | 0,6507 | 1593,75 | 1312,50 | 2156,25 | 1,693 | 0,0611 | 0,0389 | 312,4480  | 0,8722 |
| Scotland | 37 | 2775,2 | 3,664 | 0,9932 | 0,4747 | 1500,00 | 1218,75 | 2343,75 | 1,643 | 0,0649 | 0,0486 | 408,0213  | 0,8270 |
| Scotland | 37 | 2518,2 | 3,393 | 1,3220 | 0,4267 | 1593,75 | 1218,75 | 2156,25 | 1,697 | 0,4049 | 0,0445 | 495,7493  | 0,8462 |
| Scotland | 37 | 2672,4 | 3,298 | 1,1981 | 0,3307 | 1593,75 | 1312,50 | 2156,25 | 1,676 | 0,3661 | 0,0536 | 514,1067  | 0,8170 |
| Scotland | 37 | 2723,8 | 3,822 | 1,3943 | 0,4373 | 1593,75 | 1312,50 | 2437,50 | 1,807 | 0,3602 | 0,0498 | 536,8587  | 0,8966 |
| Scotland | 37 | 2621,0 | 3,504 | 1,3323 | 0,3840 | 1593,75 | 1218,75 | 2156,25 | 1,072 | 0,4819 | 0,0482 | 692,0213  | 0,8956 |
| Scotland | 37 | 2723,8 | 3,352 | 1,3323 | 0,1760 | 1593,75 | 1406,25 | 2250,00 | 1,794 | 0,5341 | 0,0442 | 944,9173  | 0,7711 |
| Russia   | 38 | 2233,6 | 3,170 | 1,0483 | 0,5600 | 1593,75 | 1312,50 | 1968,75 | 1,598 | 0,1122 | 0,0408 | 45,5093   | 0,8418 |
| Russia   | 38 | 2146,0 | 2,747 | 0,9044 | 0,4747 | 1312,50 | 1218,75 | 1687,50 | 1,314 | 0,1006 | 0,0651 | 49,5680   | 0,8817 |
| Russia   | 38 | 2365,0 | 3,300 | 0,9147 | 0,3733 | 1500,00 | 1406,25 | 2250,00 | 1,375 | 0,2105 | 0,0819 | 73,1413   | 0,8772 |
| Russia   | 38 | 2102,2 | 2,989 | 1,0380 | 0,5760 | 1406,25 | 1218,75 | 1875,00 | 1,502 | 0,0722 | 0,0515 | 111,6640  | 0,7784 |
| Russia   | 38 | 2321,2 | 3,230 | 0,8427 | 0,3147 | 1500,00 | 1312,50 | 2062,50 | 1,630 | 0,2548 | 0,0701 | 141,3547  | 0,8599 |
| Russia   | 38 | 2189,8 | 3,170 | 1,1408 | 0,5173 | 1500,00 | 1218,75 | 1968,75 | 1,590 | 0,0986 | 0,0657 | 159,6853  | 0,7371 |
| Russia   | 38 | 2277,4 | 3,335 | 1,0791 | 0,4853 | 1500,00 | 1218,75 | 2062,50 | 1,608 | 0,1144 | 0,0498 | 166,7093  | 0,7960 |
| Russia   | 39 | 2114,3 | 3,094 | 1,0668 | 0,2773 | 1312,50 | 656,25  | 1781,25 | 0,360 | 0,4070 | 0,0804 | 363,1467  | 0,8191 |
| Russia   | 39 | 2342,9 | 3,246 | 1,0324 | 0,2773 | 1312,50 | 1125,00 | 2062,50 | 1,377 | 0,3802 | 0,0781 | 392,1173  | 0,8333 |
| Russia   | 39 | 2400,0 | 3,334 | 1,1194 | 0,4960 | 562,50  | 562,50  | 1875,00 | 0,631 | 0,3062 | 0,1005 | 462,1013  | 0,8517 |

|        |    |        |       |        |        |         |         |         |       |        |        |           |        |
|--------|----|--------|-------|--------|--------|---------|---------|---------|-------|--------|--------|-----------|--------|
| Russia | 39 | 2342,9 | 3,116 | 1,0220 | 0,5973 | 1312,50 | 1218,75 | 1968,75 | 1,341 | 0,1526 | 0,1105 | 491,8560  | 0,8526 |
| Russia | 39 | 1942,9 | 2,296 | 1,1437 | 0,5547 | 1312,50 | 1218,75 | 1593,75 | 1,312 | 0,1729 | 0,0888 | 660,6827  | 0,8224 |
| Russia | 40 | 3160,0 | 4,220 | 1,0277 | 0,4053 | 1500,00 | 1312,50 | 2812,50 | 2,120 | 0,3490 | 0,0781 | 1870,0640 | 0,8646 |
| Russia | 40 | 2808,9 | 4,177 | 0,8894 | 0,3467 | 1500,00 | 1125,00 | 2625,00 | 1,873 | 0,3576 | 0,0788 | 1874,1227 | 0,8545 |
| Russia | 40 | 2691,9 | 4,262 | 0,8894 | 0,3787 | 1406,25 | 750,00  | 2531,25 | 1,223 | 0,3434 | 0,1084 | 1892,6240 | 0,9157 |
| Russia | 40 | 2808,9 | 4,110 | 1,1661 | 0,3040 | 1500,00 | 1031,25 | 2531,25 | 1,489 | 0,3899 | 0,1009 | 1898,5120 | 0,7982 |
| Russia | 40 | 2574,8 | 3,994 | 1,1661 | 0,3040 | 1593,75 | 843,75  | 2437,50 | 1,339 | 0,4700 | 0,1198 | 1903,7547 | 0,8387 |
| Russia | 40 | 2691,9 | 4,026 | 0,8894 | 0,3093 | 1593,75 | 1218,75 | 2531,25 | 1,587 | 0,4096 | 0,0783 | 1907,1733 | 0,8554 |
| Russia | 40 | 2808,9 | 4,032 | 0,9091 | 0,4053 | 1500,00 | 1031,25 | 2437,50 | 1,357 | 0,2882 | 0,1000 | 1913,4507 | 0,8294 |
| Russia | 40 | 2808,9 | 4,095 | 1,0475 | 0,3413 | 1593,75 | 1312,50 | 2531,25 | 2,085 | 0,4513 | 0,0872 | 1925,9040 | 0,8718 |
| Russia | 40 | 2926,0 | 4,139 | 1,0672 | 0,3147 | 1500,00 | 1218,75 | 2625,00 | 2,075 | 0,4422 | 0,1206 | 1933,0773 | 0,8392 |
| Russia | 40 | 2691,9 | 3,848 | 1,0870 | 0,3360 | 1500,00 | 1312,50 | 2437,50 | 1,207 | 0,4631 | 0,1084 | 2149,5360 | 0,8867 |
| Russia | 40 | 2926,0 | 3,891 | 1,0870 | 0,2880 | 1593,75 | 1312,50 | 2437,50 | 1,829 | 0,4010 | 0,0941 | 2161,6693 | 0,7871 |
| Russia | 40 | 3043,0 | 3,868 | 1,2056 | 0,3520 | 1500,00 | 1312,50 | 2531,25 | 1,790 | 0,3956 | 0,0844 | 2181,9787 | 0,8044 |
| Russia | 40 | 2691,9 | 3,859 | 1,1265 | 0,2240 | 1593,75 | 1312,50 | 2437,50 | 1,550 | 0,4857 | 0,0905 | 2190,9173 | 0,8000 |
| Russia | 41 | 2647,1 | 3,053 | 1,0062 | 0,4267 | 1218,75 | 1125,00 | 1875,00 | 1,388 | 0,1117 | 0,0691 | 562,3787  | 0,7606 |
| Russia | 41 | 2647,1 | 3,127 | 1,0342 | 0,4267 | 1312,50 | 1218,75 | 1968,75 | 1,334 | 0,1823 | 0,1250 | 574,0480  | 0,7812 |
| Russia | 41 | 2941,2 | 2,683 | 1,0621 | 0,3200 | 1312,50 | 1218,75 | 1968,75 | 1,289 | 0,1818 | 0,1414 | 656,3680  | 0,7121 |
| Russia | 41 | 3117,6 | 3,010 | 1,0621 | 0,3573 | 1312,50 | 1218,75 | 2250,00 | 1,394 | 0,1717 | 0,1212 | 667,5040  | 0,7525 |
| Russia | 41 | 3352,9 | 3,943 | 1,0342 | 0,4693 | 1312,50 | 1125,00 | 2531,25 | 1,327 | 0,2124 | 0,1036 | 689,2587  | 0,8290 |
| Russia | 41 | 3294,1 | 3,927 | 0,9783 | 0,4907 | 1218,75 | 1031,25 | 2531,25 | 1,684 | 0,1374 | 0,0659 | 697,8773  | 0,8022 |
| Russia | 41 | 3136,9 | 2,984 | 1,0475 | 0,3147 | 1312,50 | 1125,00 | 1968,75 | 1,469 | 0,2154 | 0,1282 | 1087,8667 | 0,7333 |
| Russia | 41 | 3074,1 | 2,607 | 0,8894 | 0,2027 | 1312,50 | 1218,75 | 1781,25 | 1,286 | 0,1394 | 0,1030 | 1156,2293 | 0,7030 |
| Russia | 42 | 2258,6 | 3,003 | 1,0870 | 0,5333 | 1218,75 | 1125,00 | 1781,25 | 1,471 | 0,1330 | 0,0690 | 1451,3333 | 0,8276 |
| Russia | 42 | 2258,6 | 2,578 | 1,0080 | 0,4587 | 1312,50 | 1218,75 | 1781,25 | 1,323 | 0,1436 | 0,1011 | 1468,2347 | 0,8085 |
| Russia | 42 | 2133,1 | 2,998 | 1,0080 | 0,5440 | 1312,50 | 1125,00 | 1781,25 | 1,394 | 0,1436 | 0,0851 | 1473,6853 | 0,8245 |
| Russia | 42 | 2384,0 | 3,116 | 1,2056 | 0,4213 | 1218,75 | 937,50  | 1875,00 | 1,411 | 0,1244 | 0,0711 | 1491,7067 | 0,7689 |
| Russia | 42 | 2384,0 | 3,249 | 1,1858 | 0,5440 | 1218,75 | 937,50  | 1875,00 | 1,218 | 0,1584 | 0,0724 | 1517,3547 | 0,8145 |
| Russia | 42 | 2572,2 | 2,752 | 1,2847 | 0,5067 | 1312,50 | 1218,75 | 1875,00 | 1,298 | 0,1000 | 0,0542 | 1611,6853 | 0,7500 |
| Russia | 43 | 2258,8 | 2,706 | 1,3509 | 0,2027 | 1500,00 | 1312,50 | 1875,00 | 1,082 | 0,5119 | 0,3968 | 41,3120   | 0,7897 |
| Russia | 43 | 2070,6 | 2,661 | 1,0947 | 0,3893 | 1406,25 | 1218,75 | 1687,50 | 1,356 | 0,3137 | 0,0882 | 45,1413   | 0,8137 |



|        |    |        |       |        |        |         |         |         |       |        |        |           |        |
|--------|----|--------|-------|--------|--------|---------|---------|---------|-------|--------|--------|-----------|--------|
| Russia | 43 | 2070,6 | 2,349 | 1,3043 | 0,1760 | 1406,25 | 1312,50 | 1687,50 | 1,334 | 0,4650 | 0,1317 | 85,2213   | 0,6996 |
| Russia | 43 | 2164,7 | 2,282 | 1,2112 | 0,1760 | 1500,00 | 1406,25 | 1687,50 | 1,298 | 0,5133 | 0,3496 | 140,3893  | 0,8186 |
| Russia | 43 | 2117,6 | 2,604 | 1,1646 | 0,2133 | 1500,00 | 1406,25 | 1875,00 | 1,570 | 0,5550 | 0,4083 | 174,3093  | 0,8440 |
| Russia | 43 | 2211,8 | 2,263 | 1,2112 | 0,1600 | 1593,75 | 1500,00 | 1781,25 | 1,275 | 0,5929 | 0,5000 | 202,1600  | 0,8274 |
| Russia | 43 | 2258,8 | 2,360 | 1,1646 | 0,1760 | 1500,00 | 1406,25 | 1781,25 | 1,268 | 0,5346 | 0,4654 | 228,5547  | 0,7880 |
| Russia | 43 | 2305,9 | 2,597 | 1,3276 | 0,2347 | 1593,75 | 1500,00 | 1968,75 | 1,475 | 0,5685 | 0,4798 | 278,7947  | 0,8750 |
| Russia | 43 | 2211,8 | 2,722 | 1,2578 | 0,1280 | 1593,75 | 1406,25 | 1875,00 | 1,338 | 0,6043 | 0,4426 | 322,8320  | 0,8213 |
| Russia | 43 | 2117,6 | 2,315 | 1,2345 | 0,1760 | 1593,75 | 1500,00 | 1781,25 | 1,362 | 0,4957 | 0,3957 | 383,3067  | 0,7391 |
| Russia | 43 | 2023,5 | 2,372 | 1,1646 | 0,1493 | 1500,00 | 1406,25 | 1781,25 | 1,290 | 0,5000 | 0,0780 | 450,7467  | 0,7752 |
| Russia | 43 | 1882,4 | 3,065 | 1,2345 | 0,2933 | 1406,25 | 1218,75 | 1875,00 | 1,548 | 0,4545 | 0,0996 | 477,2320  | 0,8485 |
| Russia | 43 | 1788,2 | 2,477 | 1,1413 | 0,1973 | 1406,25 | 1218,75 | 1687,50 | 1,312 | 0,4366 | 0,1033 | 495,8613  | 0,7512 |
| Russia | 43 | 1929,4 | 3,083 | 1,0481 | 0,4267 | 1312,50 | 1125,00 | 1875,00 | 0,793 | 0,1224 | 0,0765 | 498,6400  | 0,7806 |
| Russia | 43 | 1788,2 | 2,660 | 0,9550 | 0,2347 | 1406,25 | 1218,75 | 1781,25 | 0,927 | 0,3989 | 0,1067 | 526,2987  | 0,8315 |
| Russia | 43 | 1835,3 | 2,669 | 1,1879 | 0,3253 | 1406,25 | 1125,00 | 1781,25 | 0,783 | 0,4820 | 0,1081 | 556,2720  | 0,8198 |
| Russia | 43 | 2164,7 | 3,070 | 1,0016 | 0,4960 | 1406,25 | 1218,75 | 1875,00 | 1,492 | 0,2032 | 0,1337 | 559,6480  | 0,8289 |
| Russia | 43 | 2258,8 | 2,828 | 1,1413 | 0,1760 | 1593,75 | 1406,25 | 1968,75 | 1,416 | 0,6009 | 0,4554 | 968,3253  | 0,8451 |
| Russia | 43 | 2352,9 | 3,102 | 1,1879 | 0,2080 | 1406,25 | 1218,75 | 1875,00 | 1,394 | 0,5045 | 0,1126 | 971,4453  | 0,8514 |
| Russia | 43 | 2117,6 | 3,125 | 1,2578 | 0,2187 | 1500,00 | 1218,75 | 1875,00 | 1,383 | 0,4851 | 0,1149 | 1085,0453 | 0,7957 |
| Russia | 44 | 1976,5 | 2,339 | 1,2188 | 0,5653 | 1312,50 | 1218,75 | 1593,75 | 1,292 | 0,1410 | 0,1013 | 34,9387   | 0,7665 |
| Russia | 44 | 2070,6 | 2,432 | 1,1364 | 0,5653 | 1406,25 | 1218,75 | 1687,50 | 1,295 | 0,0896 | 0,0566 | 81,5520   | 0,7925 |
| Russia | 44 | 1741,2 | 2,586 | 1,2023 | 0,5493 | 1312,50 | 1125,00 | 1687,50 | 1,312 | 0,1518 | 0,0938 | 105,7387  | 0,7679 |
| Russia | 44 | 1976,5 | 2,356 | 0,8729 | 0,4000 | 1406,25 | 1218,75 | 1687,50 | 1,264 | 0,1043 | 0,0736 | 108,7680  | 0,8098 |
| Russia | 44 | 1976,5 | 2,553 | 1,0541 | 0,4747 | 1312,50 | 1218,75 | 1593,75 | 1,363 | 0,1320 | 0,0761 | 113,0240  | 0,8020 |
| Russia | 44 | 1929,4 | 2,467 | 1,0870 | 0,5120 | 1406,25 | 1218,75 | 1687,50 | 1,140 | 0,0739 | 0,0493 | 247,1573  | 0,7833 |
| Russia | 44 | 2070,6 | 2,746 | 1,2188 | 0,5600 | 1312,50 | 1125,00 | 1687,50 | 1,403 | 0,0925 | 0,0573 | 259,8507  | 0,8018 |
| Russia | 44 | 2070,6 | 2,457 | 1,0541 | 0,4747 | 1312,50 | 1218,75 | 1593,75 | 1,310 | 0,0964 | 0,0609 | 290,5707  | 0,7513 |
| Russia | 44 | 1788,2 | 2,375 | 0,8894 | 0,4587 | 1312,50 | 1218,75 | 1593,75 | 1,384 | 0,0904 | 0,0542 | 294,7893  | 0,8193 |
| Russia | 44 | 1976,5 | 2,885 | 1,0705 | 0,4480 | 1218,75 | 1031,25 | 1687,50 | 1,447 | 0,1300 | 0,0750 | 315,3440  | 0,8150 |
| Russia | 44 | 2117,6 | 2,343 | 1,1529 | 0,4907 | 1312,50 | 1218,75 | 1593,75 | 1,284 | 0,0744 | 0,0558 | 336,3520  | 0,7349 |
| Russia | 44 | 1929,4 | 2,935 | 1,0541 | 0,5120 | 1312,50 | 843,75  | 1593,75 | 1,329 | 0,1122 | 0,0612 | 462,9280  | 0,8520 |
| Russia | 44 | 1835,3 | 2,686 | 1,0705 | 0,5067 | 1312,50 | 1125,00 | 1593,75 | 1,352 | 0,1400 | 0,0700 | 547,1840  | 0,8250 |

|        |    |        |       |        |        |         |         |         |       |        |        |          |        |
|--------|----|--------|-------|--------|--------|---------|---------|---------|-------|--------|--------|----------|--------|
| Russia | 44 | 1819,4 | 2,162 | 0,9388 | 0,3733 | 1312,50 | 1218,75 | 1500,00 | 1,280 | 0,1029 | 0,0686 | 649,8720 | 0,7714 |
| Russia | 44 | 2007,6 | 2,599 | 0,9717 | 0,1547 | 1312,50 | 1125,00 | 1593,75 | 1,364 | 0,1050 | 0,0663 | 653,2480 | 0,7459 |
| Russia | 44 | 1944,9 | 2,447 | 1,0541 | 0,4693 | 1312,50 | 1218,75 | 1593,75 | 1,354 | 0,1429 | 0,0867 | 670,7467 | 0,7857 |
| Russia | 44 | 1944,9 | 2,456 | 0,9717 | 0,4320 | 1312,50 | 1218,75 | 1687,50 | 1,341 | 0,1326 | 0,0884 | 684,0320 | 0,8287 |
| Russia | 44 | 2007,6 | 2,263 | 1,0705 | 0,5333 | 1312,50 | 1218,75 | 1593,75 | 1,287 | 0,1300 | 0,0600 | 763,1147 | 0,8000 |
| Russia | 45 | 1757,1 | 2,695 | 0,9243 | 0,4960 | 1218,75 | 1031,25 | 1500,00 | 1,290 | 0,1163 | 0,0640 | 10,0800  | 0,8198 |
| Russia | 45 | 1799,9 | 2,946 | 1,0188 | 0,5920 | 1312,50 | 937,50  | 1593,75 | 1,561 | 0,1105 | 0,0526 | 69,9893  | 0,8684 |
| Russia | 45 | 1928,5 | 3,319 | 0,9663 | 0,4373 | 1125,00 | 843,75  | 1687,50 | 1,376 | 0,2500 | 0,0778 | 89,2160  | 0,9000 |
| Russia | 45 | 1971,3 | 3,090 | 0,8928 | 0,1600 | 1218,75 | 1031,25 | 1687,50 | 1,282 | 0,4759 | 0,0964 | 100,0693 | 0,8735 |
| Russia | 45 | 1757,1 | 2,405 | 0,9558 | 0,1280 | 1312,50 | 1125,00 | 1593,75 | 1,321 | 0,5225 | 0,0674 | 160,1920 | 0,8315 |
| Russia | 46 | 2206,6 | 2,806 | 0,8545 | 0,1547 | 1406,25 | 1218,75 | 1781,25 | 1,347 | 0,5346 | 0,1069 | 102,0800 | 0,8553 |
| Russia | 46 | 2166,5 | 3,067 | 1,0277 | 0,2773 | 1406,25 | 1125,00 | 1781,25 | 1,352 | 0,4921 | 0,1099 | 129,3173 | 0,8848 |
| Russia | 46 | 2286,8 | 2,932 | 1,1085 | 0,2240 | 1406,25 | 1218,75 | 1875,00 | 1,531 | 0,5169 | 0,1498 | 285,7387 | 0,8406 |
| Russia | 46 | 2126,3 | 3,014 | 1,0046 | 0,5760 | 1312,50 | 1125,00 | 1781,25 | 1,407 | 0,1283 | 0,0749 | 291,0080 | 0,8289 |
| Russia | 46 | 2086,2 | 2,911 | 0,9930 | 0,2240 | 1406,25 | 1218,75 | 1781,25 | 1,236 | 0,4865 | 0,1027 | 300,2187 | 0,8216 |
| Russia | 46 | 2400,0 | 2,928 | 1,1474 | 0,1973 | 1406,25 | 1312,50 | 1875,00 | 1,335 | 0,4673 | 0,0748 | 37,1200  | 0,7757 |
| Russia | 47 | 2362,4 | 3,813 | 1,1772 | 0,2613 | 1500,00 | 1031,25 | 2250,00 | 1,756 | 0,4864 | 0,0727 | 61,2213  | 0,8500 |
| Russia | 47 | 2362,4 | 3,878 | 1,0285 | 0,2987 | 1406,25 | 937,50  | 2250,00 | 1,934 | 0,3698 | 0,0521 | 77,5413  | 0,8385 |
| Russia | 47 | 2577,2 | 3,618 | 1,2887 | 0,2773 | 1406,25 | 937,50  | 2343,75 | 1,650 | 0,4250 | 0,1125 | 140,2240 | 0,8250 |
| Russia | 47 | 2362,4 | 3,819 | 1,2019 | 0,6293 | 1218,75 | 1031,25 | 2156,25 | 1,673 | 0,1339 | 0,0670 | 142,8053 | 0,8884 |
| Russia | 47 | 2201,3 | 3,306 | 0,8674 | 0,3840 | 1312,50 | 1125,00 | 1968,75 | 1,536 | 0,2160 | 0,1111 | 145,9627 | 0,8395 |
| Russia | 47 | 2308,7 | 3,645 | 1,1028 | 0,6133 | 1218,75 | 1031,25 | 2062,50 | 1,402 | 0,1456 | 0,0728 | 191,0027 | 0,8398 |
| Russia | 48 | 2335,1 | 2,958 | 0,4743 | 0,2187 | 1406,25 | 1312,50 | 1875,00 | 1,787 | 0,1818 | 0,1136 | 16,1920  | 0,7386 |
| Russia | 48 | 2270,3 | 3,185 | 0,5617 | 0,2720 | 1406,25 | 1218,75 | 1968,75 | 1,417 | 0,1635 | 0,0769 | 17,5680  | 0,7404 |
| Russia | 48 | 2400,0 | 3,085 | 0,7614 | 0,3520 | 1406,25 | 1312,50 | 1968,75 | 1,539 | 0,2113 | 0,0563 | 34,6347  | 0,7817 |
| Russia | 48 | 2659,5 | 3,313 | 0,6490 | 0,2667 | 1406,25 | 1312,50 | 2062,50 | 1,551 | 0,1333 | 0,0833 | 38,4747  | 0,7000 |
| Russia | 48 | 2464,9 | 3,395 | 0,8238 | 0,2613 | 1500,00 | 1312,50 | 2062,50 | 1,741 | 0,4314 | 0,0588 | 59,2213  | 0,8562 |
| Russia | 49 | 2534,5 | 3,288 | 1,0984 | 0,5227 | 1500,00 | 1312,50 | 2062,50 | 1,852 | 0,1122 | 0,0732 | 23,1573  | 0,8585 |
| Russia | 49 | 2379,3 | 3,163 | 0,8238 | 0,2720 | 1500,00 | 1312,50 | 1968,75 | 1,789 | 0,1494 | 0,1039 | 25,8080  | 0,7857 |
| Russia | 49 | 2534,5 | 3,578 | 0,8113 | 0,3893 | 1593,75 | 1312,50 | 2250,00 | 2,069 | 0,1457 | 0,0993 | 64,0640  | 0,8278 |
| Russia | 49 | 2379,3 | 3,599 | 0,8363 | 0,5973 | 1312,50 | 1125,00 | 2062,50 | 1,642 | 0,1154 | 0,0449 | 81,1520  | 0,9679 |

|        |    |        |       |        |        |         |         |         |       |        |        |          |        |
|--------|----|--------|-------|--------|--------|---------|---------|---------|-------|--------|--------|----------|--------|
| Russia | 49 | 2534,5 | 3,520 | 0,8113 | 0,3840 | 1500,00 | 1312,50 | 2156,25 | 1,737 | 0,1523 | 0,0993 | 82,6933  | 0,7947 |
| Russia | 49 | 2556,5 | 3,624 | 0,9817 | 0,5120 | 1687,50 | 1312,50 | 2343,75 | 2,057 | 0,1967 | 0,0546 | 77,6320  | 0,8907 |
| Russia | 49 | 2347,8 | 3,537 | 0,9239 | 0,5013 | 1406,25 | 1218,75 | 2062,50 | 2,069 | 0,0465 | 0,0116 | 80,4907  | 0,8023 |
| Russia | 49 | 2452,2 | 3,625 | 1,0279 | 0,7093 | 1500,00 | 1218,75 | 2250,00 | 1,475 | 0,0990 | 0,0625 | 121,7547 | 0,9062 |
| Russia | 49 | 2243,5 | 3,311 | 0,9239 | 0,5120 | 1593,75 | 1312,50 | 2156,25 | 1,693 | 0,0930 | 0,0640 | 191,9627 | 0,8663 |
| Russia | 49 | 2400,0 | 3,402 | 0,9239 | 0,5600 | 1593,75 | 1218,75 | 2156,25 | 2,142 | 0,0930 | 0,0581 | 202,7947 | 0,8895 |
| Russia | 49 | 2347,8 | 3,414 | 1,2126 | 0,7147 | 1500,00 | 1312,50 | 2156,25 | 1,800 | 0,0885 | 0,0575 | 235,4080 | 0,8584 |
| Russia | 49 | 2400,0 | 3,347 | 1,2011 | 0,6773 | 1406,25 | 1218,75 | 2062,50 | 1,828 | 0,0848 | 0,0446 | 279,9520 | 0,8214 |
| Russia | 50 | 2552,1 | 3,892 | 1,0859 | 0,7093 | 1500,00 | 1218,75 | 2437,50 | 1,931 | 0,1139 | 0,0594 | 161,6960 | 0,9158 |
| Russia | 50 | 2503,1 | 3,626 | 0,9731 | 0,6027 | 1406,25 | 1218,75 | 2250,00 | 1,725 | 0,1050 | 0,0773 | 180,9013 | 0,9006 |
| Russia | 50 | 2748,5 | 3,712 | 0,6769 | 0,2613 | 1593,75 | 1406,25 | 2437,50 | 1,961 | 0,1920 | 0,1120 | 192,9333 | 0,8240 |
| Russia | 50 | 2208,6 | 3,207 | 0,9308 | 0,3413 | 1500,00 | 1312,50 | 2062,50 | 1,345 | 0,0977 | 0,0690 | 229,2053 | 0,7759 |
| Russia | 50 | 2503,1 | 3,541 | 1,1705 | 0,2773 | 1687,50 | 1500,00 | 2343,75 | 1,883 | 0,4932 | 0,0913 | 231,8133 | 0,8813 |
| Russia | 50 | 2257,7 | 3,544 | 0,9167 | 0,5333 | 1406,25 | 1125,00 | 2062,50 | 1,732 | 0,1228 | 0,0702 | 279,3653 | 0,8538 |
| Russia | 51 | 2251,5 | 3,649 | 1,2128 | 0,4480 | 1312,50 | 1031,25 | 2062,50 | 1,644 | 0,3717 | 0,0929 | 39,3227  | 0,8938 |
| Russia | 51 | 2538,9 | 3,620 | 1,3139 | 0,6613 | 1312,50 | 1031,25 | 2062,50 | 1,730 | 0,1306 | 0,0776 | 42,8213  | 0,8327 |
| Russia | 51 | 2586,8 | 3,772 | 1,2128 | 0,5013 | 1218,75 | 937,50  | 2062,50 | 1,849 | 0,1549 | 0,0841 | 46,1973  | 0,7920 |
| Russia | 51 | 2586,8 | 3,797 | 1,5160 | 0,6773 | 1312,50 | 1031,25 | 2156,25 | 1,664 | 0,1444 | 0,0704 | 115,7173 | 0,7923 |
| Russia | 51 | 2634,7 | 3,670 | 1,1623 | 0,5440 | 1218,75 | 1031,25 | 2062,50 | 1,702 | 0,1751 | 0,1060 | 119,5253 | 0,8525 |
| Russia | 51 | 2730,5 | 3,804 | 1,1370 | 0,5120 | 1218,75 | 1031,25 | 2250,00 | 1,686 | 0,2113 | 0,1268 | 124,3520 | 0,9390 |
| Russia | 51 | 2155,7 | 3,423 | 0,8338 | 0,3360 | 1312,50 | 1031,25 | 1875,00 | 1,764 | 0,1355 | 0,0581 | 137,5200 | 0,8258 |
| Russia | 52 | 2202,9 | 2,631 | 1,0766 | 0,5227 | 1406,25 | 1218,75 | 1687,50 | 1,364 | 0,1244 | 0,0697 | 98,4533  | 0,7711 |
| Russia | 52 | 2087,0 | 2,502 | 1,0527 | 0,4640 | 1406,25 | 1218,75 | 1687,50 | 1,324 | 0,1320 | 0,1015 | 105,5147 | 0,7462 |
| Russia | 52 | 2087,0 | 2,478 | 0,9570 | 0,1173 | 1312,50 | 1218,75 | 1687,50 | 1,388 | 0,1173 | 0,0894 | 113,4720 | 0,6872 |
| Russia | 52 | 2087,0 | 2,760 | 1,0527 | 0,5387 | 1406,25 | 1218,75 | 1687,50 | 1,361 | 0,0964 | 0,0761 | 130,2560 | 0,7665 |
| Russia | 52 | 2202,9 | 2,532 | 0,9809 | 0,5227 | 1406,25 | 1218,75 | 1687,50 | 1,345 | 0,1202 | 0,0874 | 142,8960 | 0,7596 |
| Russia | 52 | 2144,9 | 2,853 | 0,9570 | 0,4693 | 1312,50 | 1218,75 | 1781,25 | 1,361 | 0,1732 | 0,1285 | 147,7493 | 0,8492 |
| Russia | 52 | 2087,0 | 2,952 | 0,9570 | 0,4640 | 1312,50 | 1218,75 | 1781,25 | 1,084 | 0,1676 | 0,1061 | 151,2373 | 0,7933 |
| Russia | 53 | 2425,5 | 3,621 | 1,2907 | 0,4373 | 1593,75 | 1312,50 | 2343,75 | 1,792 | 0,4149 | 0,1245 | 861,0933 | 0,8423 |
| Russia | 53 | 2170,2 | 3,417 | 1,2558 | 0,4107 | 1500,00 | 1218,75 | 2156,25 | 1,687 | 0,3830 | 0,1234 | 871,7973 | 0,8596 |
| Russia | 53 | 2744,7 | 4,043 | 1,1163 | 0,3787 | 1687,50 | 1312,50 | 2625,00 | 2,287 | 0,4258 | 0,1100 | 881,1413 | 0,8373 |

|        |    |        |       |        |        |         |         |         |       |        |        |           |        |
|--------|----|--------|-------|--------|--------|---------|---------|---------|-------|--------|--------|-----------|--------|
| Russia | 53 | 2617,0 | 3,897 | 1,2558 | 0,3733 | 1687,50 | 1312,50 | 2531,25 | 1,984 | 0,4658 | 0,1368 | 917,0133  | 0,8376 |
| Russia | 53 | 2553,2 | 3,840 | 1,2209 | 0,6080 | 1687,50 | 1312,50 | 2531,25 | 1,407 | 0,2719 | 0,0746 | 943,4560  | 0,8421 |
| Russia | 53 | 2553,2 | 3,798 | 0,9767 | 0,2933 | 1781,25 | 1406,25 | 2531,25 | 1,632 | 0,5137 | 0,1421 | 958,5867  | 0,8907 |
| Russia | 53 | 2234,0 | 3,276 | 0,8140 | 0,3147 | 1593,75 | 1406,25 | 2156,25 | 1,312 | 0,4079 | 0,1316 | 1024,2880 | 0,8750 |
| Russia | 53 | 2106,4 | 2,935 | 0,9373 | 0,4160 | 1406,25 | 1218,75 | 1875,00 | 1,348 | 0,1200 | 0,0914 | 1054,2187 | 0,7200 |
| Russia | 53 | 2425,5 | 3,528 | 1,0360 | 0,3093 | 1687,50 | 1406,25 | 2343,75 | 2,120 | 0,4611 | 0,1399 | 1078,2080 | 0,8342 |
| Russia | 53 | 2680,9 | 3,767 | 1,1840 | 0,3253 | 1687,50 | 1406,25 | 2531,25 | 1,884 | 0,5339 | 0,1493 | 1104,7413 | 0,9050 |
| Russia | 53 | 2234,0 | 3,033 | 1,2087 | 0,2560 | 1500,00 | 1312,50 | 2062,50 | 1,668 | 0,4356 | 0,0889 | 1190,7573 | 0,7689 |
| Russia | 53 | 2425,5 | 2,989 | 1,0607 | 0,2667 | 1406,25 | 1218,75 | 1968,75 | 1,317 | 0,4264 | 0,0863 | 1205,1947 | 0,7970 |
| Russia | 53 | 2042,6 | 2,721 | 1,1100 | 0,5227 | 1406,25 | 1218,75 | 1781,25 | 1,318 | 0,1643 | 0,1159 | 1218,9813 | 0,7729 |
| Russia | 53 | 2425,5 | 2,919 | 1,1347 | 0,5333 | 1406,25 | 1312,50 | 1968,75 | 1,373 | 0,1185 | 0,0758 | 1250,2347 | 0,7393 |
| Russia | 53 | 2489,4 | 3,341 | 1,1593 | 0,5333 | 1406,25 | 1218,75 | 2062,50 | 1,334 | 0,1481 | 0,0972 | 1269,4293 | 0,7269 |
| Russia | 53 | 2553,2 | 3,160 | 1,2087 | 0,3093 | 1406,25 | 1312,50 | 2062,50 | 1,390 | 0,3156 | 0,0667 | 1287,1680 | 0,7333 |
| Russia | 53 | 2680,9 | 3,314 | 1,1593 | 0,5760 | 1500,00 | 1218,75 | 2156,25 | 1,492 | 0,1157 | 0,0602 | 1370,7947 | 0,7454 |
| Russia | 53 | 2553,2 | 3,412 | 1,2087 | 0,2773 | 1500,00 | 1312,50 | 2156,25 | 1,396 | 0,4336 | 0,1062 | 1402,7840 | 0,7699 |
| Russia | 53 | 2553,2 | 3,495 | 1,2827 | 0,6560 | 1500,00 | 1312,50 | 2156,25 | 1,408 | 0,1333 | 0,0958 | 1424,0533 | 0,7542 |
| Russia | 54 | 2224,4 | 3,017 | 1,0814 | 0,5227 | 1406,25 | 1312,50 | 1968,75 | 1,326 | 0,1095 | 0,0796 | 3283,6053 | 0,7562 |
| Russia | 54 | 2224,4 | 3,088 | 1,0640 | 0,5653 | 1406,25 | 1312,50 | 1968,75 | 1,261 | 0,0754 | 0,0553 | 3300,2027 | 0,7940 |
| Russia | 54 | 2165,9 | 3,319 | 1,0291 | 0,5547 | 1406,25 | 1218,75 | 2062,50 | 0,946 | 0,1414 | 0,0838 | 3311,0507 | 0,8429 |
| Russia | 54 | 2165,9 | 3,218 | 0,9767 | 0,6027 | 1406,25 | 1312,50 | 1968,75 | 1,457 | 0,0879 | 0,0440 | 3316,6720 | 0,8571 |
| Russia | 54 | 2165,9 | 3,512 | 0,9767 | 0,5600 | 1406,25 | 1125,00 | 2062,50 | 1,753 | 0,1093 | 0,0437 | 3320,4160 | 0,8306 |
| Russia | 54 | 2048,8 | 2,861 | 0,9419 | 0,3520 | 1312,50 | 1218,75 | 1781,25 | 1,293 | 0,2727 | 0,1023 | 3325,5680 | 0,7955 |
| Russia | 54 | 2224,4 | 3,458 | 0,9767 | 0,5387 | 1406,25 | 937,50  | 1968,75 | 1,015 | 0,1319 | 0,0549 | 3335,5413 | 0,8736 |
| Russia | 54 | 2165,9 | 3,338 | 1,1512 | 0,5813 | 1406,25 | 1218,75 | 1968,75 | 1,375 | 0,1023 | 0,0651 | 3390,0480 | 0,7721 |
| Russia | 54 | 2282,9 | 2,327 | 1,2384 | 0,2293 | 1312,50 | 1218,75 | 1500,00 | 1,321 | 0,3810 | 0,0736 | 3476,6560 | 0,6710 |
| Russia | 55 | 2042,6 | 2,752 | 0,9373 | 0,3627 | 1312,50 | 1125,00 | 1687,50 | 1,303 | 0,1494 | 0,1207 | 152,4480  | 0,7069 |
| Russia | 55 | 2297,9 | 3,466 | 0,8880 | 0,3680 | 1593,75 | 1312,50 | 2250,00 | 1,888 | 0,3494 | 0,0964 | 176,4107  | 0,8976 |
| Russia | 55 | 2489,4 | 3,585 | 1,1840 | 0,3413 | 1593,75 | 1312,50 | 2250,00 | 1,868 | 0,4480 | 0,1041 | 202,9387  | 0,8597 |
| Russia | 55 | 2170,2 | 2,825 | 1,0853 | 0,2613 | 1500,00 | 1312,50 | 1968,75 | 1,661 | 0,4532 | 0,0837 | 289,0187  | 0,8276 |
| Russia | 55 | 2234,0 | 2,614 | 1,0853 | 0,2667 | 1406,25 | 1218,75 | 1781,25 | 1,290 | 0,3960 | 0,0891 | 303,4347  | 0,7525 |
| Russia | 55 | 2234,0 | 2,509 | 1,0113 | 0,5227 | 1406,25 | 1218,75 | 1687,50 | 1,330 | 0,1481 | 0,0952 | 317,2427  | 0,8042 |

|         |    |        |       |        |        |         |         |         |       |        |        |          |        |
|---------|----|--------|-------|--------|--------|---------|---------|---------|-------|--------|--------|----------|--------|
| Russia  | 55 | 2361,7 | 2,939 | 1,1100 | 0,5013 | 1406,25 | 1218,75 | 1781,25 | 1,307 | 0,1490 | 0,1058 | 367,6747 | 0,7404 |
| Russia  | 55 | 2297,9 | 2,557 | 1,0607 | 0,3147 | 1406,25 | 1312,50 | 1687,50 | 1,302 | 0,3401 | 0,0964 | 385,3600 | 0,7766 |
| Russia  | 55 | 2489,4 | 2,818 | 1,0360 | 0,5653 | 1406,25 | 1218,75 | 1781,25 | 1,361 | 0,1192 | 0,0829 | 469,0080 | 0,7927 |
| Russia  | 55 | 2234,0 | 2,884 | 1,1347 | 0,2453 | 1500,00 | 1312,50 | 1875,00 | 1,445 | 0,4387 | 0,1085 | 481,9147 | 0,7500 |
| Finland | 56 | 2202,9 | 3,105 | 0,8077 | 0,4053 | 1312,50 | 1125,00 | 1781,25 | 1,687 | 0,1589 | 0,0596 | 4,7413   | 0,8874 |
| Finland | 56 | 2434,8 | 3,245 | 0,8456 | 0,3893 | 1312,50 | 1125,00 | 1968,75 | 1,962 | 0,1266 | 0,0506 | 14,6453  | 0,8228 |
| Finland | 56 | 2144,9 | 3,156 | 0,9591 | 0,4907 | 1218,75 | 1031,25 | 1781,25 | 1,674 | 0,1676 | 0,0615 | 32,7787  | 0,9050 |
| Finland | 56 | 2087,0 | 2,996 | 0,9213 | 0,4320 | 1218,75 | 1031,25 | 1687,50 | 1,688 | 0,2035 | 0,0581 | 37,2640  | 0,8663 |
| Finland | 56 | 1855,1 | 2,976 | 0,9591 | 0,4267 | 1218,75 | 1031,25 | 1687,50 | 1,624 | 0,1955 | 0,0726 | 40,1653  | 0,8827 |
| Finland | 56 | 2144,9 | 2,867 | 0,8077 | 0,3307 | 1312,50 | 1125,00 | 1781,25 | 1,483 | 0,1333 | 0,0667 | 44,7360  | 0,8133 |
| Finland | 56 | 2144,9 | 2,811 | 0,9591 | 0,4480 | 1312,50 | 1125,00 | 1687,50 | 1,642 | 0,1517 | 0,0506 | 54,9013  | 0,8315 |
| Finland | 56 | 2202,9 | 3,075 | 0,8960 | 0,4213 | 1312,50 | 1125,00 | 1781,25 | 1,588 | 0,1377 | 0,0719 | 59,2533  | 0,8204 |
| Finland | 56 | 2144,9 | 3,065 | 0,9087 | 0,4320 | 1312,50 | 1125,00 | 1781,25 | 1,519 | 0,1361 | 0,0592 | 65,9893  | 0,8107 |
| Finland | 56 | 2260,9 | 3,010 | 0,8329 | 0,3947 | 1312,50 | 1125,00 | 1781,25 | 1,709 | 0,1419 | 0,0645 | 72,0000  | 0,8258 |
| Finland | 56 | 2144,9 | 2,983 | 0,9465 | 0,3893 | 1312,50 | 1125,00 | 1781,25 | 1,406 | 0,1356 | 0,0565 | 79,4293  | 0,7740 |
| Finland | 56 | 2202,9 | 3,041 | 0,8456 | 0,4213 | 1312,50 | 1125,00 | 1781,25 | 1,634 | 0,1592 | 0,0764 | 87,2000  | 0,8280 |
| Finland | 56 | 2029,0 | 2,646 | 0,9844 | 0,3733 | 1312,50 | 1125,00 | 1687,50 | 1,360 | 0,1304 | 0,0761 | 116,3253 | 0,7880 |
| Finland | 57 | 2608,7 | 3,571 | 0,9020 | 0,4427 | 1218,75 | 937,50  | 1968,75 | 1,539 | 0,1071 | 0,0417 | 7,8880   | 0,8571 |
| Finland | 57 | 2608,7 | 3,148 | 0,8224 | 0,3680 | 1312,50 | 1218,75 | 2062,50 | 1,421 | 0,2484 | 0,0458 | 12,2773  | 0,8889 |
| Finland | 57 | 2608,7 | 3,478 | 0,7428 | 0,3893 | 1312,50 | 1125,00 | 2062,50 | 1,496 | 0,1522 | 0,0652 | 14,7520  | 0,8986 |
| Finland | 57 | 2202,9 | 2,944 | 0,7588 | 0,2027 | 1406,25 | 1125,00 | 1875,00 | 1,419 | 0,4610 | 0,1206 | 21,9413  | 0,8865 |
| Finland | 57 | 2029,0 | 1,891 | 0,7269 | 0,4000 | 1218,75 | 1125,00 | 1406,25 | 1,254 | 0,1912 | 0,0809 | 29,8187  | 0,8382 |
| Finland | 58 | 2724,6 | 3,863 | 0,6739 | 0,2880 | 1312,50 | 1031,25 | 2250,00 | 1,764 | 0,1440 | 0,0800 | 6,4800   | 0,8240 |
| Finland | 58 | 2898,6 | 3,733 | 0,9216 | 0,5013 | 1218,75 | 937,50  | 2156,25 | 1,637 | 0,1345 | 0,0643 | 28,9973  | 0,8889 |
| Finland | 58 | 2898,6 | 3,756 | 0,8126 | 0,4053 | 1312,50 | 1031,25 | 2062,50 | 1,738 | 0,1184 | 0,0592 | 36,8587  | 0,8618 |
| Finland | 58 | 2550,7 | 3,688 | 0,7234 | 0,3200 | 1218,75 | 937,50  | 2062,50 | 1,543 | 0,2222 | 0,0963 | 41,3067  | 0,9037 |
| Finland | 58 | 2666,7 | 2,811 | 0,7433 | 0,1387 | 1406,25 | 1125,00 | 1875,00 | 1,400 | 0,5652 | 0,1232 | 52,6133  | 0,8986 |
| Finland | 58 | 2898,6 | 3,643 | 0,8225 | 0,3947 | 1125,00 | 843,75  | 1968,75 | 1,735 | 0,2222 | 0,0523 | 53,4347  | 0,9085 |
| Finland | 59 | 2550,7 | 3,669 | 0,7575 | 0,3467 | 1312,50 | 1031,25 | 2062,50 | 1,690 | 0,1631 | 0,1135 | 30,9653  | 0,8440 |
| Finland | 59 | 2492,8 | 3,790 | 0,7365 | 0,3893 | 1218,75 | 843,75  | 1968,75 | 1,557 | 0,1241 | 0,0730 | 36,0800  | 0,8394 |
| Finland | 59 | 2376,8 | 3,629 | 0,9048 | 0,4320 | 1312,50 | 1031,25 | 2062,50 | 1,775 | 0,1369 | 0,0833 | 58,8907  | 0,8690 |

|         |    |        |       |        |        |         |         |         |       |        |        |          |        |
|---------|----|--------|-------|--------|--------|---------|---------|---------|-------|--------|--------|----------|--------|
| Finland | 59 | 2434,8 | 3,138 | 0,9679 | 0,3947 | 1218,75 | 1031,25 | 1875,00 | 1,428 | 0,1611 | 0,0833 | 64,2027  | 0,7556 |
| Finland | 59 | 2434,8 | 3,112 | 0,8417 | 0,4160 | 1312,50 | 1125,00 | 1875,00 | 1,471 | 0,1911 | 0,1083 | 102,1440 | 0,8854 |
| Finland | 59 | 2434,8 | 3,014 | 0,7996 | 0,3840 | 1218,75 | 1125,00 | 1875,00 | 1,381 | 0,1554 | 0,0743 | 109,7333 | 0,8446 |
| Finland | 59 | 2434,8 | 3,499 | 1,0311 | 0,4693 | 1312,50 | 1125,00 | 2062,50 | 1,448 | 0,2031 | 0,0885 | 132,8213 | 0,8333 |
| Finland | 60 | 2434,8 | 3,348 | 0,6940 | 0,3147 | 1125,00 | 843,75  | 1875,00 | 1,590 | 0,1473 | 0,0543 | 75,2107  | 0,8837 |
| Finland | 60 | 2376,8 | 3,510 | 0,6274 | 0,3040 | 1218,75 | 843,75  | 1875,00 | 1,488 | 0,1709 | 0,0598 | 80,7413  | 0,8803 |
| Finland | 60 | 2956,5 | 4,215 | 0,7329 | 0,4160 | 750,00  | 562,50  | 2062,50 | 2,235 | 0,1471 | 0,0368 | 88,8160  | 0,9191 |
| Finland | 60 | 2666,7 | 3,862 | 0,7218 | 0,3893 | 1125,00 | 843,75  | 2343,75 | 1,860 | 0,1791 | 0,0672 | 91,9360  | 0,9254 |
| Finland | 60 | 2840,6 | 4,016 | 0,7440 | 0,4373 | 1406,25 | 1031,25 | 2250,00 | 2,049 | 0,1667 | 0,0507 | 108,4320 | 0,9203 |
| Finland | 60 | 2782,6 | 3,996 | 0,6884 | 0,3733 | 1312,50 | 843,75  | 2250,00 | 1,897 | 0,1641 | 0,0469 | 126,6400 | 0,9141 |
| Finland | 60 | 2434,8 | 3,558 | 0,6551 | 0,3200 | 1593,75 | 1031,25 | 2156,25 | 1,903 | 0,1721 | 0,0574 | 170,9387 | 0,8525 |
| Finland | 60 | 2608,7 | 3,490 | 0,7162 | 0,4053 | 1312,50 | 1125,00 | 1968,75 | 1,825 | 0,1429 | 0,0602 | 181,5147 | 0,9248 |
| Finland | 60 | 2376,8 | 3,561 | 0,7273 | 0,3840 | 1312,50 | 937,50  | 1968,75 | 1,816 | 0,1259 | 0,0444 | 203,2587 | 0,8741 |
| Finland | 60 | 2318,8 | 3,221 | 0,6662 | 0,2133 | 1218,75 | 1031,25 | 1875,00 | 1,571 | 0,1371 | 0,0565 | 219,2800 | 0,8629 |
| Finland | 61 | 3188,4 | 3,323 | 1,2497 | 0,4267 | 1593,75 | 1406,25 | 2156,25 | 1,556 | 0,3991 | 0,0601 | 21,2640  | 0,8326 |
| Finland | 61 | 2782,6 | 3,390 | 1,1430 | 0,4107 | 1593,75 | 1312,50 | 2156,25 | 1,558 | 0,4299 | 0,0561 | 23,8027  | 0,8645 |
| Finland | 61 | 2840,6 | 3,762 | 0,9754 | 0,4213 | 1406,25 | 1218,75 | 2343,75 | 1,515 | 0,3901 | 0,0824 | 46,0160  | 0,8956 |
| Finland | 61 | 2956,5 | 3,126 | 1,0364 | 0,2080 | 1687,50 | 1593,75 | 2156,25 | 1,656 | 0,5130 | 0,1192 | 78,1227  | 0,8394 |
| Finland | 61 | 2492,8 | 2,855 | 0,9906 | 0,1867 | 1500,00 | 1406,25 | 1968,75 | 1,567 | 0,5784 | 0,1514 | 174,7627 | 0,8865 |
| Finland | 61 | 2202,9 | 3,073 | 1,1126 | 0,3947 | 1500,00 | 1312,50 | 1968,75 | 1,410 | 0,4203 | 0,0676 | 224,8533 | 0,8599 |
| Finland | 61 | 2666,7 | 2,912 | 1,0364 | 0,2560 | 1593,75 | 1500,00 | 2062,50 | 1,411 | 0,5309 | 0,0773 | 237,4507 | 0,8866 |
| Finland | 61 | 2492,8 | 3,229 | 1,2345 | 0,2720 | 1687,50 | 1500,00 | 2156,25 | 1,497 | 0,5844 | 0,4156 | 310,4267 | 0,8961 |
| Finland | 61 | 2724,6 | 3,625 | 1,1278 | 0,3733 | 1500,00 | 1312,50 | 2156,25 | 1,696 | 0,4882 | 0,0758 | 361,6693 | 0,9052 |
| Finland | 61 | 2608,7 | 3,181 | 0,9144 | 0,2453 | 1593,75 | 1406,25 | 2156,25 | 1,425 | 0,4176 | 0,1118 | 428,1387 | 0,8471 |
| Finland | 62 | 2608,7 | 2,805 | 1,1660 | 0,4000 | 1218,75 | 1125,00 | 2062,50 | 1,413 | 0,3670 | 0,0550 | 40,2027  | 0,9083 |
| Finland | 62 | 2550,7 | 2,461 | 1,0148 | 0,4587 | 1218,75 | 1125,00 | 1593,75 | 1,325 | 0,1316 | 0,0526 | 42,3947  | 0,8737 |
| Finland | 62 | 2376,8 | 2,640 | 1,2848 | 0,4213 | 1218,75 | 1125,00 | 1781,25 | 1,359 | 0,3473 | 0,0544 | 107,5360 | 0,8828 |
| Finland | 62 | 2434,8 | 2,720 | 1,1120 | 0,5547 | 1125,00 | 1125,00 | 1781,25 | 1,382 | 0,1442 | 0,0481 | 109,8133 | 0,8510 |
| Finland | 62 | 2492,8 | 2,297 | 1,1444 | 0,2560 | 1218,75 | 1125,00 | 1687,50 | 1,287 | 0,3832 | 0,0981 | 145,2587 | 0,8738 |
| Finland | 62 | 2550,7 | 2,688 | 1,0041 | 0,2880 | 1218,75 | 1125,00 | 1781,25 | 1,341 | 0,3262 | 0,0749 | 149,0133 | 0,8877 |
| Finland | 62 | 3072,5 | 2,670 | 1,0148 | 0,2027 | 1218,75 | 1125,00 | 1875,00 | 1,351 | 0,3947 | 0,0947 | 216,4053 | 0,8368 |

|         |    |        |       |        |        |         |         |         |       |        |        |          |        |
|---------|----|--------|-------|--------|--------|---------|---------|---------|-------|--------|--------|----------|--------|
| Finland | 62 | 2840,6 | 2,362 | 1,1228 | 0,3413 | 1218,75 | 1125,00 | 1687,50 | 1,332 | 0,2679 | 0,0718 | 259,2960 | 0,8756 |
| Finland | 62 | 2550,7 | 2,328 | 1,2740 | 0,2933 | 1218,75 | 1125,00 | 1781,25 | 1,301 | 0,3235 | 0,0714 | 303,2853 | 0,8655 |
| Finland | 63 | 2376,8 | 2,405 | 0,9349 | 0,1600 | 1500,00 | 1406,25 | 1781,25 | 1,282 | 0,5805 | 0,0920 | 25,6907  | 0,8736 |
| Finland | 63 | 2898,6 | 2,965 | 0,8681 | 0,1600 | 1500,00 | 1312,50 | 1968,75 | 1,395 | 0,5652 | 0,1801 | 41,8453  | 0,8634 |
| Finland | 63 | 2492,8 | 2,507 | 0,9516 | 0,1707 | 1500,00 | 1406,25 | 1875,00 | 1,382 | 0,5367 | 0,0678 | 70,4267  | 0,8362 |
| Finland | 63 | 2550,7 | 2,747 | 0,7680 | 0,4160 | 1500,00 | 1312,50 | 1875,00 | 1,431 | 0,2028 | 0,0769 | 72,3840  | 0,8671 |
| Finland | 63 | 2376,8 | 2,769 | 0,8180 | 0,1547 | 1500,00 | 1406,25 | 1968,75 | 1,400 | 0,4868 | 0,1118 | 86,3627  | 0,8092 |
| Finland | 63 | 2260,9 | 2,587 | 0,7346 | 0,3573 | 1500,00 | 1312,50 | 1875,00 | 1,349 | 0,1460 | 0,0876 | 88,5920  | 0,7445 |
| Finland | 64 | 2434,8 | 3,317 | 1,0916 | 0,3200 | 1406,25 | 1125,00 | 1968,75 | 1,472 | 0,4510 | 0,0833 | 31,2693  | 0,8333 |
| Finland | 64 | 2318,8 | 3,202 | 1,0656 | 0,2987 | 1500,00 | 1218,75 | 1875,00 | 1,431 | 0,4646 | 0,0808 | 133,0613 | 0,8182 |
| Finland | 64 | 2492,8 | 3,195 | 0,9487 | 0,5387 | 1406,25 | 1218,75 | 1875,00 | 1,530 | 0,1017 | 0,0791 | 139,8827 | 0,7797 |
| Finland | 64 | 2434,8 | 3,242 | 0,9877 | 0,4587 | 1406,25 | 1125,00 | 1875,00 | 1,388 | 0,2989 | 0,0924 | 147,6160 | 0,8696 |
| Finland | 64 | 2434,8 | 3,122 | 1,0396 | 0,2720 | 1593,75 | 1218,75 | 1968,75 | 1,571 | 0,5309 | 0,0876 | 187,0080 | 0,8557 |
| Finland | 64 | 2376,8 | 3,558 | 1,0786 | 0,5013 | 1218,75 | 1125,00 | 1968,75 | 1,317 | 0,1642 | 0,0796 | 250,6133 | 0,8109 |
| Finland | 64 | 2202,9 | 3,359 | 1,0136 | 0,3733 | 1312,50 | 1125,00 | 1875,00 | 1,664 | 0,3810 | 0,1058 | 253,5840 | 0,8571 |
| Finland | 64 | 2492,8 | 3,105 | 1,1046 | 0,2773 | 1500,00 | 1218,75 | 1875,00 | 1,455 | 0,4660 | 0,1068 | 293,0880 | 0,7816 |
| Finland | 64 | 2318,8 | 3,295 | 1,0396 | 0,3947 | 1406,25 | 1125,00 | 1968,75 | 1,565 | 0,3660 | 0,0876 | 299,7067 | 0,8196 |
| Finland | 64 | 2492,8 | 3,201 | 0,9357 | 0,3680 | 1500,00 | 1218,75 | 1875,00 | 1,573 | 0,3429 | 0,0800 | 308,6880 | 0,8229 |
| Finland | 64 | 2376,8 | 3,408 | 0,7277 | 0,3893 | 1312,50 | 1125,00 | 1875,00 | 1,592 | 0,1778 | 0,0889 | 318,4640 | 0,8963 |
| Finland | 64 | 2376,8 | 3,369 | 1,0396 | 0,5600 | 1312,50 | 1125,00 | 1875,00 | 1,655 | 0,1701 | 0,0722 | 348,2560 | 0,8299 |
| Finland | 65 | 2724,6 | 3,133 | 1,0884 | 0,2027 | 1593,75 | 1312,50 | 2062,50 | 1,522 | 0,5517 | 0,0739 | 18,8960  | 0,8128 |
| Finland | 65 | 2492,8 | 3,451 | 0,8985 | 0,2347 | 1593,75 | 1218,75 | 2062,50 | 1,615 | 0,5536 | 0,1012 | 22,4587  | 0,8929 |
| Finland | 65 | 2608,7 | 3,269 | 1,2782 | 0,2667 | 1593,75 | 1312,50 | 2062,50 | 1,535 | 0,5188 | 0,1088 | 59,9147  | 0,8033 |
| Finland | 65 | 2492,8 | 3,463 | 0,8606 | 0,4800 | 1406,25 | 1218,75 | 1968,75 | 1,600 | 0,2188 | 0,1000 | 74,2240  | 0,8562 |
| Finland | 65 | 2434,8 | 3,501 | 0,7846 | 0,4533 | 1406,25 | 1218,75 | 2062,50 | 1,574 | 0,2260 | 0,0753 | 81,0187  | 0,8904 |
| Finland | 66 | 2550,7 | 3,379 | 1,2532 | 0,3040 | 1312,50 | 1218,75 | 1968,75 | 1,664 | 0,3248 | 0,0470 | 5,5573   | 0,7393 |
| Finland | 66 | 2318,8 | 2,893 | 1,1072 | 0,2507 | 1593,75 | 1218,75 | 1875,00 | 1,345 | 0,5291 | 0,1311 | 22,3040  | 0,8107 |
| Finland | 66 | 2492,8 | 3,195 | 0,9612 | 0,3040 | 1500,00 | 1218,75 | 1968,75 | 1,606 | 0,5140 | 0,0950 | 92,3840  | 0,8827 |
| Finland | 66 | 2550,7 | 3,149 | 0,8882 | 0,3253 | 1500,00 | 1218,75 | 1968,75 | 1,509 | 0,4639 | 0,0783 | 113,0187 | 0,8916 |
| Finland | 66 | 2492,8 | 3,208 | 0,8517 | 0,4693 | 1312,50 | 1125,00 | 1875,00 | 1,474 | 0,1698 | 0,0692 | 119,0400 | 0,8239 |
| Finland | 66 | 2376,8 | 2,757 | 0,8761 | 0,2240 | 1593,75 | 1218,75 | 1875,00 | 1,261 | 0,5793 | 0,0976 | 127,6587 | 0,8780 |

|         |    |        |       |        |        |         |         |         |       |        |        |          |        |
|---------|----|--------|-------|--------|--------|---------|---------|---------|-------|--------|--------|----------|--------|
| Finland | 66 | 2492,8 | 2,873 | 0,9856 | 0,2240 | 1500,00 | 1218,75 | 1875,00 | 1,515 | 0,5761 | 0,0924 | 141,8347 | 0,8750 |
| Finland | 66 | 2608,7 | 3,459 | 0,9491 | 0,5547 | 1406,25 | 1125,00 | 1968,75 | 1,763 | 0,1307 | 0,0625 | 162,9120 | 0,8580 |
| Finland | 66 | 2666,7 | 3,507 | 0,9004 | 0,5440 | 1406,25 | 1125,00 | 1968,75 | 1,535 | 0,1905 | 0,0655 | 172,8853 | 0,8929 |
| Finland | 66 | 2608,7 | 3,492 | 0,8396 | 0,4907 | 1312,50 | 1125,00 | 1968,75 | 1,520 | 0,1795 | 0,0897 | 176,6773 | 0,8846 |
| Finland | 67 | 2608,7 | 3,446 | 0,8162 | 0,2187 | 1593,75 | 1218,75 | 2156,25 | 1,660 | 0,5461 | 0,0789 | 103,2800 | 0,8816 |
| Finland | 67 | 2260,9 | 3,360 | 0,9482 | 0,5867 | 1312,50 | 1125,00 | 1968,75 | 1,522 | 0,0909 | 0,0568 | 173,3013 | 0,8693 |
| Finland | 67 | 2376,8 | 3,320 | 0,8071 | 0,5013 | 1406,25 | 1125,00 | 1968,75 | 1,513 | 0,1060 | 0,0662 | 193,4507 | 0,8675 |
| Finland | 67 | 2492,8 | 3,247 | 0,8762 | 0,6133 | 1406,25 | 1125,00 | 1968,75 | 1,496 | 0,0798 | 0,0491 | 212,5440 | 0,8589 |
| Finland | 67 | 2318,8 | 3,223 | 0,6122 | 0,3093 | 1218,75 | 1031,25 | 1781,25 | 1,615 | 0,1579 | 0,0702 | 217,5200 | 0,8509 |
| Finland | 67 | 2434,8 | 3,261 | 0,8738 | 0,3733 | 1406,25 | 1218,75 | 1968,75 | 1,743 | 0,3558 | 0,0798 | 18,1333  | 0,9018 |
| Finland | 67 | 2550,7 | 3,309 | 0,9198 | 0,4693 | 1500,00 | 1218,75 | 1968,75 | 1,486 | 0,2733 | 0,0640 | 51,7600  | 0,8547 |
| Finland | 67 | 2376,8 | 3,436 | 0,8585 | 0,5067 | 1406,25 | 1125,00 | 1968,75 | 1,540 | 0,2062 | 0,0938 | 65,3173  | 0,8688 |
| Finland | 67 | 2144,9 | 3,289 | 0,6439 | 0,3840 | 1406,25 | 1218,75 | 1968,75 | 1,769 | 0,1849 | 0,0924 | 72,8853  | 0,8824 |
| Finland | 68 | 2318,8 | 2,517 | 1,0152 | 0,5067 | 1406,25 | 1218,75 | 1781,25 | 1,297 | 0,1105 | 0,0684 | 21,6480  | 0,7684 |
| Finland | 68 | 2434,8 | 2,824 | 1,0383 | 0,4533 | 1406,25 | 1312,50 | 1875,00 | 1,426 | 0,0984 | 0,0725 | 45,4293  | 0,7409 |
| Finland | 68 | 2202,9 | 2,735 | 1,0383 | 0,5120 | 1312,50 | 1218,75 | 1875,00 | 1,332 | 0,1082 | 0,0825 | 77,6907  | 0,7990 |
| Finland | 68 | 2202,9 | 2,459 | 0,9921 | 0,3893 | 1406,25 | 1312,50 | 1687,50 | 1,329 | 0,1189 | 0,0865 | 128,8693 | 0,7892 |
| Finland | 68 | 2202,9 | 2,479 | 0,9460 | 0,4640 | 1312,50 | 1218,75 | 1781,25 | 1,340 | 0,0966 | 0,0682 | 143,2533 | 0,8352 |
| Finland | 68 | 2202,9 | 2,716 | 0,9921 | 0,4320 | 1312,50 | 1218,75 | 1875,00 | 1,324 | 0,1189 | 0,0865 | 163,9040 | 0,7459 |
| Finland | 68 | 2318,8 | 2,353 | 0,9690 | 0,4907 | 1312,50 | 1218,75 | 1781,25 | 1,321 | 0,1050 | 0,0773 | 277,7973 | 0,7956 |
| Finland | 68 | 2434,8 | 2,714 | 0,9921 | 0,4427 | 1406,25 | 1218,75 | 1875,00 | 1,416 | 0,1081 | 0,0811 | 302,2613 | 0,8054 |
| Finland | 68 | 2434,8 | 2,688 | 0,9921 | 0,4587 | 1312,50 | 1312,50 | 1875,00 | 1,285 | 0,1297 | 0,1027 | 409,8507 | 0,8162 |
| Finland | 69 | 3072,5 | 3,603 | 0,6614 | 0,3893 | 1687,50 | 1500,00 | 2343,75 | 1,455 | 0,1870 | 0,0813 | 19,4667  | 0,8699 |
| Finland | 69 | 2898,6 | 3,299 | 0,8475 | 0,1920 | 1593,75 | 1406,25 | 2156,25 | 1,596 | 0,5949 | 0,0696 | 54,3307  | 0,8861 |
| Finland | 69 | 2782,6 | 3,471 | 0,7478 | 0,4533 | 1500,00 | 1312,50 | 2062,50 | 1,914 | 0,1655 | 0,0576 | 3,0987   | 0,8561 |
| Finland | 69 | 2724,6 | 3,502 | 0,7818 | 0,2027 | 1593,75 | 1312,50 | 2156,25 | 1,887 | 0,5655 | 0,0690 | 25,3867  | 0,9103 |
| Finland | 69 | 2724,6 | 3,147 | 0,8611 | 0,2027 | 1687,50 | 1500,00 | 2156,25 | 1,638 | 0,5963 | 0,0807 | 35,8880  | 0,8944 |
| Finland | 69 | 2608,7 | 3,193 | 0,6685 | 0,3733 | 1593,75 | 1406,25 | 2062,50 | 1,762 | 0,1040 | 0,0640 | 59,5893  | 0,8240 |
| Finland | 70 | 2260,9 | 3,089 | 0,9971 | 0,4587 | 1312,50 | 1218,75 | 1968,75 | 1,425 | 0,1129 | 0,0645 | 60,1653  | 0,8172 |
| Finland | 70 | 2202,9 | 2,534 | 0,7994 | 0,4533 | 1312,50 | 1218,75 | 1781,25 | 1,335 | 0,1007 | 0,0604 | 64,9333  | 0,8792 |
| Finland | 70 | 2550,7 | 2,497 | 0,8044 | 0,2720 | 1406,25 | 1312,50 | 1875,00 | 1,396 | 0,1600 | 0,1000 | 29,0187  | 0,7467 |



|         |    |        |       |        |        |         |         |         |       |        |        |          |        |
|---------|----|--------|-------|--------|--------|---------|---------|---------|-------|--------|--------|----------|--------|
| Finland | 70 | 2144,9 | 2,634 | 1,0424 | 0,5493 | 1406,25 | 1218,75 | 1781,25 | 1,321 | 0,0773 | 0,0464 | 149,7387 | 0,8196 |
| Finland | 70 | 2376,8 | 3,037 | 0,9177 | 0,4853 | 1312,50 | 1218,75 | 1968,75 | 1,382 | 0,1287 | 0,0760 | 156,0480 | 0,8480 |
| Finland | 70 | 2144,9 | 2,471 | 0,8611 | 0,4427 | 1312,50 | 1218,75 | 1687,50 | 1,377 | 0,1062 | 0,0688 | 231,7387 | 0,8375 |
| Finland | 71 | 2029,0 | 2,477 | 0,9779 | 0,4960 | 1312,50 | 1218,75 | 1687,50 | 1,265 | 0,1421 | 0,0546 | 0,9600   | 0,8251 |
| Finland | 71 | 2144,9 | 2,319 | 0,8363 | 0,4480 | 1312,50 | 1218,75 | 1593,75 | 1,261 | 0,1218 | 0,0449 | 6,9867   | 0,8013 |
| Finland | 71 | 2260,9 | 2,724 | 0,8492 | 0,4213 | 1312,50 | 1218,75 | 1687,50 | 1,361 | 0,1456 | 0,0759 | 14,2987  | 0,8418 |
| Finland | 71 | 2087,0 | 2,339 | 0,9521 | 0,4053 | 1312,50 | 1218,75 | 1593,75 | 1,302 | 0,1582 | 0,0847 | 185,1093 | 0,7514 |
| Finland | 71 | 2376,8 | 2,466 | 0,9521 | 0,4373 | 1312,50 | 1218,75 | 1593,75 | 1,255 | 0,1412 | 0,0565 | 197,0560 | 0,7288 |
| Finland | 71 | 2376,8 | 2,475 | 0,9135 | 0,4000 | 1218,75 | 1125,00 | 1593,75 | 1,301 | 0,1520 | 0,0819 | 219,6960 | 0,7661 |
| Finland | 71 | 2550,7 | 2,581 | 1,0036 | 0,4107 | 1312,50 | 1218,75 | 1687,50 | 1,294 | 0,1123 | 0,0535 | 306,8160 | 0,6952 |
| Finland | 71 | 2376,8 | 2,551 | 0,9521 | 0,4160 | 1312,50 | 1218,75 | 1593,75 | 1,435 | 0,1180 | 0,0562 | 313,0507 | 0,7528 |
| Finland | 71 | 2202,9 | 2,468 | 0,9521 | 0,4480 | 1312,50 | 1218,75 | 1593,75 | 1,276 | 0,1243 | 0,0734 | 321,9893 | 0,7514 |
| Finland | 71 | 2144,9 | 2,395 | 0,9007 | 0,3200 | 1312,50 | 1218,75 | 1593,75 | 1,275 | 0,1131 | 0,0595 | 343,7173 | 0,7143 |
| Finland | 71 | 2318,8 | 2,581 | 0,9907 | 0,5653 | 1312,50 | 1218,75 | 1593,75 | 1,325 | 0,0973 | 0,0595 | 366,5067 | 0,8324 |
| Finland | 71 | 2376,8 | 2,458 | 0,9907 | 0,4853 | 1312,50 | 1218,75 | 1593,75 | 1,299 | 0,1243 | 0,0919 | 392,5013 | 0,7838 |
| Finland | 71 | 2087,0 | 2,677 | 0,8878 | 0,4053 | 1312,50 | 1125,00 | 1593,75 | 1,276 | 0,1386 | 0,0663 | 490,6027 | 0,7831 |
| Finland | 72 | 2434,8 | 3,112 | 1,1358 | 0,3147 | 1406,25 | 1312,50 | 1968,75 | 1,537 | 0,5142 | 0,0991 | 1,5413   | 0,8679 |
| Finland | 72 | 2376,8 | 3,048 | 1,0985 | 0,6133 | 1312,50 | 1218,75 | 1875,00 | 1,633 | 0,0927 | 0,0537 | 51,3973  | 0,8244 |
| Finland | 72 | 2260,9 | 3,179 | 1,1358 | 0,6187 | 1218,75 | 1125,00 | 1781,25 | 1,333 | 0,1321 | 0,0896 | 58,6027  | 0,7642 |
| Finland | 72 | 2492,8 | 3,137 | 1,1730 | 0,2613 | 1406,25 | 1312,50 | 1968,75 | 1,624 | 0,4886 | 0,0822 | 72,4747  | 0,8447 |
| Finland | 72 | 2318,8 | 3,034 | 1,0613 | 0,6293 | 1406,25 | 1218,75 | 1875,00 | 1,363 | 0,0707 | 0,0404 | 77,7227  | 0,7879 |
| Finland | 72 | 2434,8 | 3,117 | 1,0799 | 0,1973 | 1593,75 | 1125,00 | 1968,75 | 1,546 | 0,4975 | 0,0995 | 130,3413 | 0,8109 |
| Finland | 73 | 2029,0 | 2,175 | 1,0848 | 0,3733 | 1218,75 | 1125,00 | 1500,00 | 1,263 | 0,1921 | 0,1232 | 54,6293  | 0,7291 |
| Finland | 73 | 1855,1 | 2,101 | 1,0286 | 0,3093 | 1218,75 | 1125,00 | 1500,00 | 1,237 | 0,1728 | 0,1099 | 84,4800  | 0,6963 |
| Finland | 73 | 1971,0 | 2,198 | 0,9164 | 0,3253 | 1218,75 | 1125,00 | 1406,25 | 1,303 | 0,1988 | 0,1345 | 94,5280  | 0,7427 |
| Finland | 73 | 1855,1 | 2,369 | 1,0099 | 0,3253 | 1218,75 | 1031,25 | 1406,25 | 1,336 | 0,2287 | 0,1117 | 115,9893 | 0,7553 |
| Finland | 73 | 1971,0 | 2,220 | 0,9725 | 0,3573 | 1218,75 | 1125,00 | 1500,00 | 1,280 | 0,1768 | 0,1105 | 133,2000 | 0,7238 |
| Finland | 73 | 2087,0 | 2,307 | 1,0286 | 0,4267 | 1218,75 | 1125,00 | 1500,00 | 1,324 | 0,1562 | 0,0938 | 148,0427 | 0,7448 |
| Finland | 73 | 2087,0 | 2,112 | 1,0661 | 0,3253 | 1218,75 | 1125,00 | 1500,00 | 1,284 | 0,1717 | 0,1010 | 206,1067 | 0,6818 |
| Finland | 73 | 2087,0 | 2,391 | 0,9351 | 0,4267 | 1218,75 | 1125,00 | 1593,75 | 1,341 | 0,1897 | 0,1092 | 241,7333 | 0,8333 |
| Finland | 74 | 2608,7 | 3,565 | 0,7835 | 0,5013 | 1593,75 | 1218,75 | 2250,00 | 1,906 | 0,1233 | 0,0548 | 17,8400  | 0,8699 |

|         |    |        |       |        |        |         |         |         |       |        |        |          |        |
|---------|----|--------|-------|--------|--------|---------|---------|---------|-------|--------|--------|----------|--------|
| Finland | 74 | 3014,5 | 4,063 | 0,7664 | 0,3040 | 1500,00 | 1218,75 | 2625,00 | 1,927 | 0,4085 | 0,1056 | 38,1387  | 0,9225 |
| Finland | 74 | 3130,4 | 3,932 | 0,8005 | 0,4747 | 1500,00 | 1218,75 | 2531,25 | 1,780 | 0,1409 | 0,0872 | 167,0133 | 0,8725 |
| Finland | 74 | 2782,6 | 3,869 | 0,7835 | 0,3733 | 1406,25 | 1218,75 | 2343,75 | 1,737 | 0,2603 | 0,1027 | 171,4987 | 0,8356 |
| Finland | 74 | 2898,6 | 3,059 | 0,7664 | 0,4053 | 1593,75 | 1312,50 | 2156,25 | 1,485 | 0,0979 | 0,0699 | 194,4960 | 0,8182 |
| Finland | 74 | 2724,6 | 3,333 | 1,0327 | 0,1973 | 1687,50 | 1406,25 | 2156,25 | 1,859 | 0,5521 | 0,0677 | 30,1760  | 0,8490 |
| Finland | 74 | 2782,6 | 3,306 | 1,0014 | 0,2560 | 1593,75 | 1406,25 | 2156,25 | 1,716 | 0,4706 | 0,0642 | 50,7733  | 0,8396 |
| Finland | 74 | 3014,5 | 3,983 | 0,9957 | 0,2613 | 1687,50 | 1406,25 | 2625,00 | 1,846 | 0,4839 | 0,0753 | 113,0187 | 0,8441 |
| Finland | 75 | 2290,2 | 2,636 | 1,1005 | 0,3193 | 1378,13 | 1291,99 | 1722,66 | 1,516 | 0,4762 | 0,0423 | 1,0797   | 0,8677 |
| Finland | 75 | 2023,9 | 2,673 | 1,1727 | 0,5921 | 1378,13 | 1205,86 | 1722,66 | 1,490 | 0,1891 | 0,0398 | 6,8150   | 0,8607 |
| Finland | 75 | 2023,9 | 2,539 | 1,0284 | 0,5863 | 1378,13 | 1205,86 | 1636,52 | 1,395 | 0,1412 | 0,0621 | 10,5651  | 0,8701 |
| Finland | 75 | 2130,4 | 2,706 | 1,1186 | 0,3251 | 1378,13 | 1291,99 | 1722,66 | 1,303 | 0,4271 | 0,0625 | 18,9126  | 0,8698 |
| Finland | 75 | 2077,2 | 2,582 | 1,0825 | 0,6037 | 1378,13 | 1291,99 | 1636,52 | 1,454 | 0,1243 | 0,0486 | 38,9224  | 0,8541 |
| Finland | 75 | 2290,2 | 2,557 | 1,0645 | 0,5050 | 1291,99 | 1205,86 | 1636,52 | 1,292 | 0,1257 | 0,0656 | 44,3385  | 0,8197 |
| Finland | 75 | 2396,7 | 2,874 | 1,1547 | 0,7198 | 1378,13 | 1291,99 | 1808,79 | 1,418 | 0,1768 | 0,0758 | 63,3789  | 0,9040 |
| Finland | 75 | 2237,0 | 2,858 | 1,1005 | 0,5515 | 1291,99 | 1205,86 | 1722,66 | 1,491 | 0,1005 | 0,0423 | 68,2086  | 0,8307 |
| Finland | 75 | 2237,0 | 2,853 | 1,1186 | 0,3077 | 1378,13 | 1205,86 | 1808,79 | 1,360 | 0,4167 | 0,0990 | 86,8716  | 0,8698 |
| Finland | 75 | 2290,2 | 2,674 | 1,0825 | 0,5457 | 1291,99 | 1205,86 | 1722,66 | 1,438 | 0,1027 | 0,0541 | 93,7157  | 0,8378 |
| Finland | 75 | 2237,0 | 3,036 | 1,1186 | 0,3715 | 1378,13 | 1205,86 | 1808,79 | 1,667 | 0,3927 | 0,0733 | 119,1822 | 0,8796 |
| Finland | 75 | 2130,4 | 2,584 | 1,1727 | 0,5805 | 1378,13 | 1291,99 | 1636,52 | 1,389 | 0,1542 | 0,0647 | 130,5019 | 0,8358 |
| Finland | 75 | 2237,0 | 2,784 | 1,1727 | 0,7082 | 1378,13 | 1291,99 | 1722,66 | 1,539 | 0,1095 | 0,0597 | 149,0547 | 0,8706 |
| Finland | 75 | 2343,5 | 2,920 | 1,2088 | 0,5573 | 1378,13 | 1291,99 | 1808,79 | 1,564 | 0,1208 | 0,0628 | 153,8844 | 0,8551 |
| Finland | 75 | 2183,7 | 2,964 | 1,1727 | 0,6502 | 1378,13 | 1291,99 | 1894,92 | 1,547 | 0,0945 | 0,0498 | 193,7299 | 0,8507 |
| Finland | 75 | 2183,7 | 2,825 | 1,2268 | 0,6037 | 1291,99 | 1205,86 | 1722,66 | 1,497 | 0,1524 | 0,0762 | 213,8035 | 0,8619 |
| Finland | 75 | 2343,5 | 2,622 | 1,1727 | 0,2670 | 1378,13 | 1205,86 | 1722,66 | 1,485 | 0,5025 | 0,1244 | 229,0706 | 0,8756 |
| Finland | 75 | 2237,0 | 2,674 | 1,1908 | 0,6850 | 1378,13 | 1291,99 | 1722,66 | 1,413 | 0,1324 | 0,0588 | 250,5201 | 0,8480 |
| Finland | 76 | 2450,0 | 3,087 | 0,8568 | 0,3657 | 1119,73 | 947,46  | 1808,79 | 1,633 | 0,1769 | 0,1156 | 13,0148  | 0,8639 |
| Finland | 76 | 2450,0 | 3,271 | 0,7153 | 0,2554 | 1205,86 | 947,46  | 1722,66 | 1,568 | 0,2049 | 0,0656 | 57,2488  | 0,8607 |
| Finland | 76 | 2343,5 | 2,810 | 0,9983 | 0,3831 | 1119,73 | 1033,59 | 1722,66 | 1,370 | 0,1228 | 0,0409 | 103,2823 | 0,8363 |
| Finland | 76 | 2183,7 | 2,556 | 0,9118 | 0,3773 | 1119,73 | 1033,59 | 1464,26 | 1,449 | 0,1795 | 0,0577 | 116,3784 | 0,7885 |
| Finland | 76 | 2130,4 | 2,856 | 0,8096 | 0,3657 | 1119,73 | 861,33  | 1550,39 | 1,631 | 0,1232 | 0,0507 | 119,5653 | 0,8768 |
| Finland | 76 | 2290,2 | 2,377 | 0,9590 | 0,4180 | 1205,86 | 1033,59 | 1378,13 | 1,408 | 0,1463 | 0,0549 | 146,7907 | 0,8049 |

|         |    |        |       |        |        |         |         |         |       |        |        |          |        |
|---------|----|--------|-------|--------|--------|---------|---------|---------|-------|--------|--------|----------|--------|
| Finland | 76 | 2290,2 | 2,928 | 1,0533 | 0,4470 | 1205,86 | 1119,73 | 1722,66 | 1,524 | 0,1823 | 0,0442 | 231,7177 | 0,8950 |
| Finland | 77 | 2237,0 | 3,842 | 1,0690 | 0,4470 | 1205,86 | 861,33  | 1981,06 | 1,837 | 0,4076 | 0,0598 | 92,4096  | 0,9402 |
| Finland | 77 | 2556,5 | 4,046 | 1,0847 | 0,6269 | 1378,13 | 1033,59 | 2239,45 | 2,193 | 0,1882 | 0,0376 | 108,3907 | 0,9140 |
| Finland | 77 | 2450,0 | 3,661 | 0,9197 | 0,4760 | 1464,26 | 1205,86 | 2153,32 | 1,595 | 0,2102 | 0,0127 | 111,4035 | 0,9299 |
| Finland | 77 | 2503,3 | 3,611 | 1,1083 | 0,3193 | 1550,39 | 1205,86 | 2153,32 | 1,592 | 0,4947 | 0,0842 | 123,2457 | 0,9211 |
| Finland | 77 | 2769,6 | 3,646 | 1,1005 | 0,5050 | 1464,26 | 1205,86 | 2067,19 | 1,663 | 0,4149 | 0,0426 | 139,1049 | 0,9415 |
| Finland | 77 | 2769,6 | 3,448 | 1,1555 | 0,3309 | 1550,39 | 1378,13 | 2153,32 | 1,425 | 0,5606 | 0,3737 | 191,4891 | 0,9343 |
| Finland | 77 | 2556,5 | 3,377 | 1,1162 | 0,3773 | 1464,26 | 1291,99 | 2153,32 | 1,438 | 0,4503 | 0,0419 | 273,0086 | 0,9215 |
| Finland | 77 | 2450,0 | 3,476 | 1,2184 | 0,4063 | 1550,39 | 1205,86 | 2067,19 | 1,606 | 0,4306 | 0,1148 | 295,6481 | 0,8708 |
| Finland | 78 | 2343,5 | 3,675 | 0,9221 | 0,3425 | 1550,39 | 1205,86 | 2153,32 | 2,217 | 0,4684 | 0,1139 | 24,5028  | 0,9241 |
| Finland | 78 | 2556,5 | 3,966 | 1,0091 | 0,5050 | 1464,26 | 1205,86 | 2325,59 | 1,920 | 0,3023 | 0,0523 | 34,1449  | 0,9012 |
| Finland | 78 | 2663,0 | 3,937 | 0,8873 | 0,3599 | 1464,26 | 1291,99 | 2411,72 | 2,040 | 0,3487 | 0,1053 | 60,4531  | 0,8750 |
| Finland | 78 | 2556,5 | 3,786 | 0,9395 | 0,3889 | 1550,39 | 1205,86 | 2239,45 | 1,818 | 0,3727 | 0,1056 | 78,4428  | 0,8882 |
| Finland | 78 | 2503,3 | 3,655 | 0,6959 | 0,3309 | 1464,26 | 1205,86 | 2153,32 | 2,027 | 0,2941 | 0,0588 | 85,3101  | 0,9076 |
| Finland | 78 | 2609,8 | 3,596 | 0,8525 | 0,4528 | 1550,39 | 1378,13 | 2239,45 | 1,730 | 0,1781 | 0,0822 | 110,4399 | 0,8630 |
| Finland | 78 | 2876,1 | 4,022 | 0,9395 | 0,3947 | 1464,26 | 1205,86 | 2583,98 | 1,967 | 0,3354 | 0,0932 | 188,6389 | 0,8758 |
| Finland | 79 | 2237,0 | 3,247 | 0,9569 | 0,5399 | 1378,13 | 1119,73 | 1894,92 | 1,519 | 0,1840 | 0,0920 | 29,6983  | 0,8589 |
| Finland | 79 | 2237,0 | 3,636 | 1,0786 | 0,4180 | 1291,99 | 1119,73 | 1981,06 | 1,508 | 0,3243 | 0,0703 | 59,2341  | 0,8486 |
| Finland | 79 | 2183,7 | 2,807 | 0,9917 | 0,1916 | 1550,39 | 1291,99 | 1808,79 | 1,489 | 0,5471 | 0,0941 | 140,3530 | 0,8353 |
| Finland | 79 | 2130,4 | 2,873 | 0,8351 | 0,2148 | 1464,26 | 1291,99 | 1808,79 | 1,351 | 0,4825 | 0,0699 | 143,0059 | 0,8392 |
| Finland | 79 | 2237,0 | 3,272 | 0,9221 | 0,2961 | 1464,26 | 1205,86 | 1894,92 | 1,626 | 0,4747 | 0,0759 | 180,9241 | 0,8797 |
| Finland | 79 | 2290,2 | 3,170 | 0,8003 | 0,3773 | 1291,99 | 1205,86 | 1808,79 | 1,596 | 0,1985 | 0,0662 | 183,1126 | 0,8162 |
| Finland | 79 | 2396,7 | 3,283 | 0,9047 | 0,2380 | 1464,26 | 1205,86 | 1894,92 | 1,544 | 0,4710 | 0,1097 | 227,9735 | 0,8323 |
| Finland | 79 | 2237,0 | 3,261 | 0,8525 | 0,4528 | 1378,13 | 1205,86 | 1894,92 | 1,681 | 0,1575 | 0,0822 | 232,4143 | 0,8493 |
| Finland | 80 | 2183,7 | 2,741 | 0,6656 | 0,3715 | 1464,26 | 1291,99 | 1808,79 | 1,317 | 0,0877 | 0,0526 | 11,5055  | 0,7719 |
| Finland | 80 | 2130,4 | 2,304 | 0,6656 | 0,3889 | 1464,26 | 1378,13 | 1722,66 | 1,254 | 0,1062 | 0,0796 | 27,1267  | 0,8407 |
| Finland | 80 | 2237,0 | 2,691 | 0,6798 | 0,4238 | 1550,39 | 1378,13 | 1808,79 | 1,346 | 0,1034 | 0,0690 | 35,7703  | 0,8621 |
| Finland | 80 | 2077,2 | 2,483 | 0,6939 | 0,4063 | 1464,26 | 1378,13 | 1808,79 | 1,267 | 0,1176 | 0,0756 | 57,1559  | 0,8235 |
| Finland | 80 | 2130,4 | 2,769 | 0,6231 | 0,3251 | 1464,26 | 1291,99 | 1808,79 | 1,494 | 0,1215 | 0,0748 | 59,8668  | 0,8131 |
| Finland | 80 | 2023,9 | 1,942 | 0,6089 | 0,0987 | 1378,13 | 1291,99 | 1550,39 | 1,288 | 0,1154 | 0,0673 | 73,2183  | 0,7692 |
| Finland | 80 | 2023,9 | 2,782 | 0,6231 | 0,3541 | 1378,13 | 1291,99 | 1808,79 | 1,437 | 0,1226 | 0,0660 | 78,5183  | 0,8491 |

|         |    |        |       |        |        |         |         |         |       |        |        |          |        |
|---------|----|--------|-------|--------|--------|---------|---------|---------|-------|--------|--------|----------|--------|
| Finland | 80 | 2130,4 | 2,681 | 0,6798 | 0,3483 | 1378,13 | 1291,99 | 1808,79 | 1,296 | 0,1379 | 0,0690 | 98,4700  | 0,8190 |
| Finland | 80 | 2077,2 | 2,475 | 0,7789 | 0,4180 | 1464,26 | 1378,13 | 1722,66 | 1,239 | 0,1203 | 0,0902 | 141,0322 | 0,8195 |
| Finland | 81 | 2130,4 | 3,089 | 0,8919 | 0,4470 | 1378,13 | 1119,73 | 1722,66 | 1,478 | 0,1382 | 0,0921 | 18,3089  | 0,7829 |
| Finland | 81 | 2077,2 | 2,832 | 0,8540 | 0,4470 | 1464,26 | 1291,99 | 1722,66 | 1,319 | 0,1233 | 0,0753 | 54,5321  | 0,7534 |
| Finland | 81 | 2130,4 | 2,523 | 0,8730 | 0,4238 | 1464,26 | 1291,99 | 1722,66 | 1,318 | 0,1467 | 0,0933 | 123,7856 | 0,7200 |
| Finland | 81 | 2609,8 | 2,342 | 1,1007 | 0,5805 | 1550,39 | 1464,26 | 1808,79 | 1,435 | 0,0794 | 0,0582 | 204,6084 | 0,7143 |
| Finland | 81 | 2450,0 | 2,740 | 1,0248 | 0,5515 | 1464,26 | 1378,13 | 1808,79 | 1,399 | 0,0795 | 0,0568 | 236,5417 | 0,7386 |
| Finland | 82 | 2077,2 | 2,931 | 1,0106 | 0,3831 | 1291,99 | 1119,73 | 1722,66 | 1,538 | 0,1792 | 0,0520 | 12,9625  | 0,7514 |
| Finland | 82 | 1970,7 | 2,380 | 0,8141 | 0,2612 | 1205,86 | 1205,86 | 1550,39 | 1,347 | 0,1942 | 0,0791 | 15,7838  | 0,7986 |
| Finland | 82 | 2183,7 | 2,700 | 0,9966 | 0,3657 | 1205,86 | 1119,73 | 1636,52 | 1,358 | 0,2105 | 0,0994 | 51,7457  | 0,8012 |
| Finland | 82 | 2077,2 | 2,382 | 1,0106 | 0,4005 | 1291,99 | 1119,73 | 1550,39 | 1,248 | 0,1561 | 0,0520 | 59,4721  | 0,8497 |
| Finland | 82 | 1970,7 | 2,232 | 0,7580 | 0,2612 | 1205,86 | 1119,73 | 1464,26 | 1,307 | 0,1615 | 0,0538 | 62,2817  | 0,7846 |
| Finland | 82 | 1970,7 | 2,581 | 0,9124 | 0,2961 | 1205,86 | 1119,73 | 1550,39 | 1,392 | 0,2051 | 0,0897 | 66,3220  | 0,7885 |
| Finland | 82 | 1917,4 | 2,419 | 1,0106 | 0,3831 | 1205,86 | 1119,73 | 1550,39 | 1,344 | 0,1437 | 0,0747 | 69,7411  | 0,7586 |
| Finland | 82 | 2183,7 | 2,433 | 1,0247 | 0,2844 | 1291,99 | 1119,73 | 1550,39 | 1,428 | 0,2102 | 0,0568 | 94,0234  | 0,7045 |
| Finland | 82 | 2023,9 | 2,226 | 0,7720 | 0,2844 | 1205,86 | 1119,73 | 1464,26 | 1,286 | 0,2121 | 0,0682 | 97,8315  | 0,7955 |
| Finland | 82 | 2077,2 | 2,438 | 1,0668 | 0,4180 | 1205,86 | 1205,86 | 1550,39 | 1,286 | 0,1749 | 0,0929 | 101,0765 | 0,8142 |
| Finland | 82 | 1917,4 | 2,184 | 0,8983 | 0,3425 | 1205,86 | 1119,73 | 1464,26 | 1,350 | 0,2078 | 0,0844 | 104,9484 | 0,8377 |
| Finland | 82 | 2023,9 | 2,349 | 0,8703 | 0,2961 | 1205,86 | 1205,86 | 1550,39 | 1,317 | 0,2215 | 0,0940 | 113,8881 | 0,8054 |
| Finland | 82 | 1864,1 | 1,994 | 0,8983 | 0,3135 | 1205,86 | 1205,86 | 1464,26 | 1,296 | 0,1307 | 0,0654 | 117,0866 | 0,7190 |
| Finland | 82 | 2077,2 | 2,545 | 1,0949 | 0,3077 | 1291,99 | 1205,86 | 1636,52 | 1,397 | 0,1968 | 0,0691 | 129,7821 | 0,6809 |
| Finland | 82 | 2077,2 | 2,589 | 0,9545 | 0,3367 | 1291,99 | 1205,86 | 1636,52 | 1,353 | 0,1534 | 0,0613 | 137,4679 | 0,7178 |
| Finland | 82 | 2077,2 | 2,689 | 1,0247 | 0,3657 | 1291,99 | 1119,73 | 1636,52 | 1,439 | 0,1771 | 0,0800 | 144,8228 | 0,7771 |
| Finland | 82 | 1970,7 | 2,234 | 1,0387 | 0,3831 | 1291,99 | 1205,86 | 1550,39 | 1,285 | 0,1573 | 0,0730 | 149,5539 | 0,7303 |
| Finland | 82 | 2077,2 | 2,122 | 1,1229 | 0,3715 | 1291,99 | 1205,86 | 1550,39 | 1,253 | 0,1865 | 0,0881 | 155,5621 | 0,7565 |
| Finland | 82 | 1970,7 | 2,072 | 0,9405 | 0,2902 | 1205,86 | 1119,73 | 1464,26 | 1,252 | 0,1739 | 0,0745 | 157,9711 | 0,6894 |
| Finland | 82 | 2183,7 | 2,422 | 0,9405 | 0,3135 | 1291,99 | 1205,86 | 1636,52 | 1,302 | 0,1739 | 0,0932 | 162,3655 | 0,7516 |
| Finland | 82 | 2130,4 | 2,608 | 0,8562 | 0,2322 | 1291,99 | 1205,86 | 1636,52 | 1,348 | 0,3562 | 0,1301 | 168,1531 | 0,8356 |
| Finland | 82 | 2077,2 | 2,523 | 0,8983 | 0,2438 | 1291,99 | 1205,86 | 1636,52 | 1,375 | 0,3182 | 0,1039 | 176,5355 | 0,8117 |
| Finland | 82 | 2077,2 | 2,100 | 0,9966 | 0,3251 | 1291,99 | 1205,86 | 1550,39 | 1,291 | 0,1754 | 0,0936 | 180,5526 | 0,7602 |
| Finland | 82 | 2130,4 | 2,347 | 0,9124 | 0,2728 | 1291,99 | 1205,86 | 1636,52 | 1,209 | 0,1667 | 0,0833 | 187,1702 | 0,7051 |

|         |    |        |       |        |        |         |         |         |       |        |        |          |        |
|---------|----|--------|-------|--------|--------|---------|---------|---------|-------|--------|--------|----------|--------|
| Finland | 82 | 2199,6 | 2,782 | 0,8703 | 0,3309 | 1291,99 | 1205,86 | 1722,66 | 1,437 | 0,2215 | 0,1007 | 196,3711 | 0,8456 |
| Finland | 82 | 2038,7 | 2,189 | 1,0247 | 0,3947 | 1291,99 | 1205,86 | 1550,39 | 1,277 | 0,1143 | 0,0571 | 200,8758 | 0,7429 |

Tabele S1: Values of the variables included in the resulting DFA model.
